# Supplementary material for: Burdens of post-acute sequelae of COVID-19 by severity of acute infection, demographics and health status
Source: PubMed Central journal article supplement (PMC8589966; doi:10.1038/s41467-021-26513-3), 2021-11-12
Supplement: 41467_2021_26513_MOESM1_ESM.pdf [file 41467_2021_26513_MOESM1_ESM.pdf]

## Supplementary Information

### Burdens of post-acute sequelae of COVID-19 by severity of acute infection, demographics and health status

Yan Xie; Benjamin Bowe; and Ziyad Al-Aly

#### Supplementary figures:

**Supplementary Figure 1:** Risks and burdens of Post-Acute Sequelae of SARS-CoV-2 infection (PASC) after 12 weeks. Risks and burdens and 95% confidence intervals at 6-months were estimated at 6 months. Estimates of burdens per 1000 COVID-19 patients at 6-months are presented.

**Supplementary Figure 2:** A schematic of cohort design.

#### Supplementary tables:

**Supplementary Table 1:** Unadjusted number and percentage of incident clinical manifestation in 1) users of Veterans Health Administration (VHA) without COVID-19, 2) COVID-19 patients, 3) non-hospitalized COVID-19 patients, 4) hospitalized COVID-19 patients, and 5) COVID-19 patients admitted to intensive care.

**Supplementary Table 2:** Risks and burdens of individual sequela in 30-day survivors of COVID-19.

**Supplementary Table 3:** Unadjusted overall burden of Post-Acute Sequelae of SARS-CoV-2 infection (PASC) per 1000 persons at 6 months in the overall cohort and across care setting (non-hospitalized, hospitalized, and admitted to intensive care during the acute phase of the infection).

**Supplementary Table 4:** Adjusted burden of individual clinical manifestations per 1000 persons at 6 months in 1) users of Veterans Health Administration (VHA) without COVID-19, 2) Overall COVID-19 patients, 3) non-hospitalized COVID-19 patients, 4) hospitalized COVID-19 patients, and 5) COVID-19 patients admitted to intensive care.

**Supplementary Table 5:** Burden of Post-acute Sequelae of COVID-19 individual sequelae in the overall cohort and by age, race, sex, and health status.

**Supplementary Table 6:** Differences in burden of individual Post-acute Sequelae of COVID-19 by age, race, sex, and health status in the overall cohort.

**Supplementary Table 7:** Burden of Post-acute Sequelae of COVID-19 individual sequelae in the overall cohort and by age, race, sex, and health status in non-hospitalized COVID-19.

**Supplementary Table 8:** Burden of Post-acute Sequelae of COVID-19 individual sequelae in the overall cohort and by age, race, sex, and health status in hospitalized COVID-19.

**Supplementary Table 9:** Burden of Post-acute Sequelae of COVID-19 individual sequelae in the overall cohort and by age, race, sex, and health status in COVID-19 admitted to intensive care.

**Supplementary Table 10:** Overall burden of Post-Acute Sequelae of SARS-CoV-2 infection (PASC) after 12 weeks per 1000 persons at 6 months in the overall cohort and across care setting (non-hospitalized, hospitalized, and admitted to intensive care during the acute phase of the infection).

**Supplementary Table 11:** Risks and burdens of individual sequela after 12 weeks infection of COVID-19.

**Supplementary Table 12:** Results of negative outcome controls in people with COVID-19, and in non-hospitalized, hospitalized, and admitted to intensive care for COVID-19.

**Supplementary Table 13:** Definition of each Post-Acute Sequela of SARS-CoV-2 infection

Supplementary Figure 1: Risks and burdens of Post-Acute Sequelae of SARS-CoV-2 infection (PASC) after 12 weeks. Hazard ratio and 95% confidence intervals were presented in left panel and burdens per 1000 COVID-19 patients at 6-months are presented in right panel

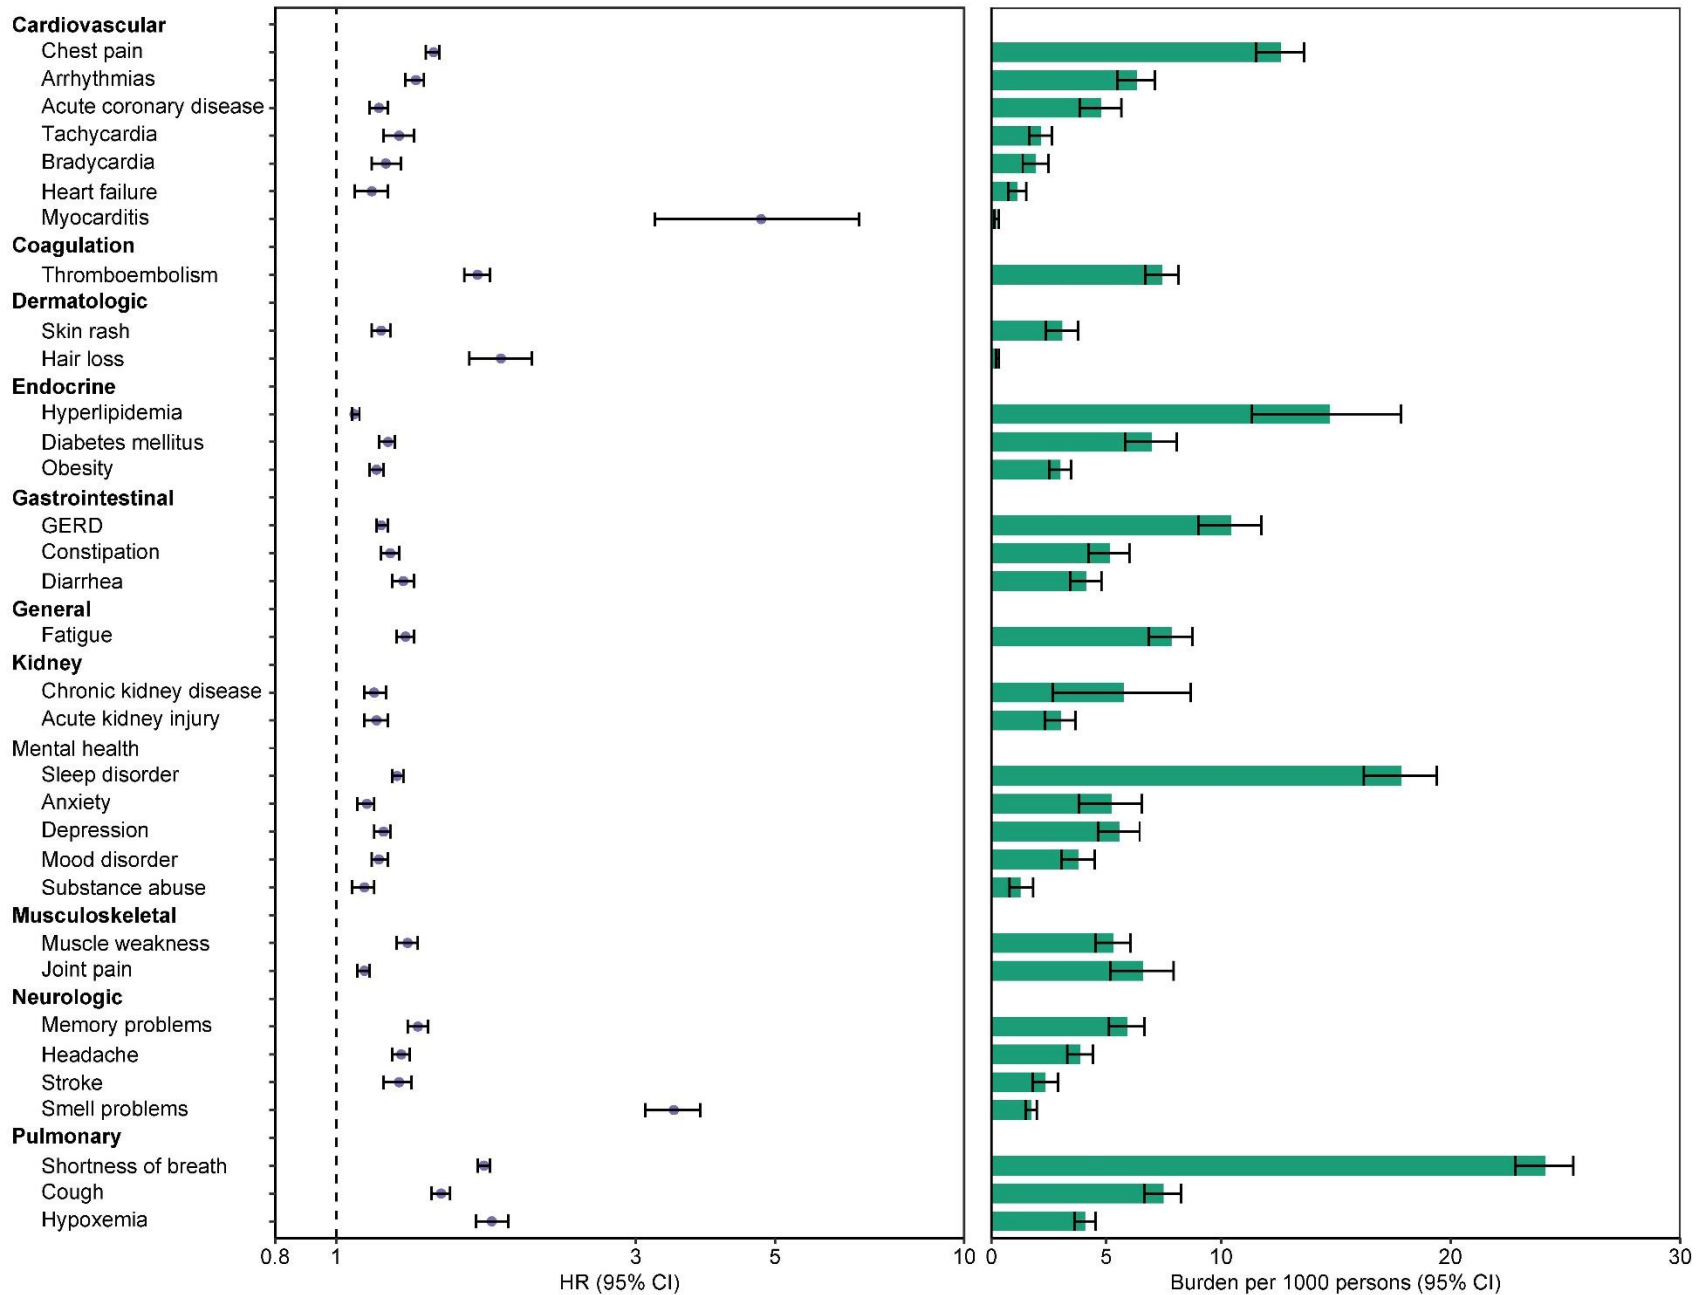

Supplementary Figure 2: A schematic of cohort design

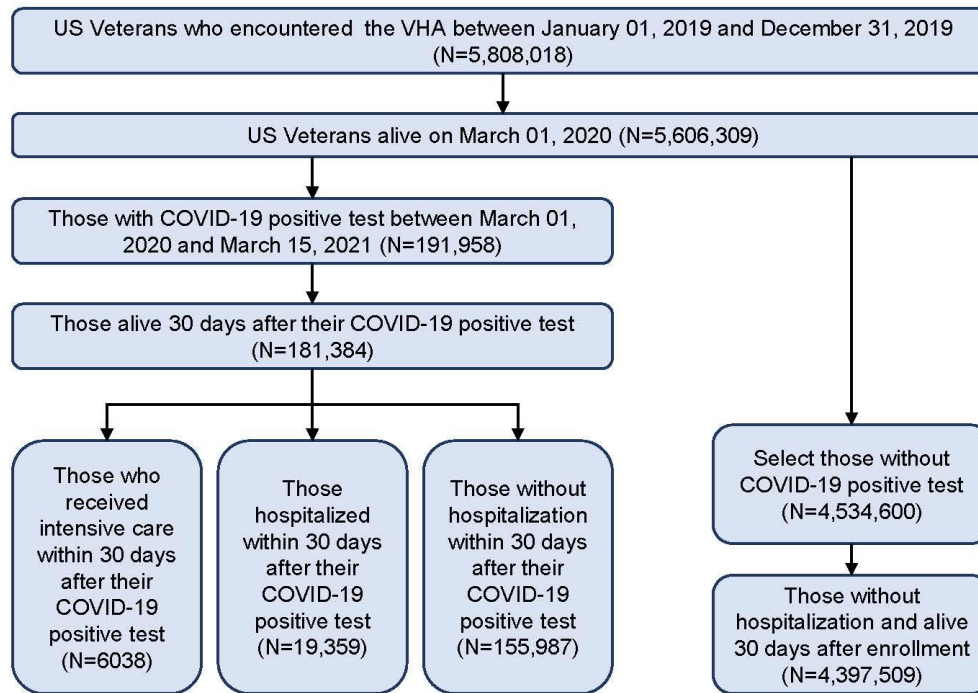

Supplementary Table 1: Unadjusted number and percentage of incident clinical manifestations during the follow up in 1) users of Veterans Health Administration (VHA) without COVID-19, 2) Overall COVID-19 patients, 3) non-hospitalized COVID-19 patients, 4) hospitalized COVID-19 patients, and 5) COVID-19 patients admitted to intensive care

| Organ            | Clinical manifestation | VHA users<br>Unadjusted<br>number of events<br>(%) | Overall COVID-<br>19<br>Unadjusted<br>number of events<br>(%) | Non-hospitalized<br>COVID-19<br>Unadjusted<br>number of events<br>(%) | Hospitalized<br>COVID-19<br>Unadjusted<br>number of events<br>(%) | COVID-19<br>admitted to<br>intensive care<br>Unadjusted<br>number of events<br>(%) |
|------------------|------------------------|----------------------------------------------------|---------------------------------------------------------------|-----------------------------------------------------------------------|-------------------------------------------------------------------|------------------------------------------------------------------------------------|
| Cardiovascular   | Acute coronary disease | 60217 (1.54)                                       | 3694 (2.36)                                                   | 2332 (1.7)                                                            | 910 (6.14)                                                        | 452 (10.01)                                                                        |
|                  | Arrhythmias            | 33623 (0.78)                                       | 3073 (1.77)                                                   | 2217 (1.48)                                                           | 561 (3.12)                                                        | 295 (5.41)                                                                         |
|                  | Bradycardia            | 14729 (0.34)                                       | 1297 (0.73)                                                   | 787 (0.51)                                                            | 327 (1.76)                                                        | 183 (3.16)                                                                         |
|                  | Chest pain             | 54552 (1.29)                                       | 5270 (3.16)                                                   | 3897 (2.69)                                                           | 1027 (6.22)                                                       | 346 (6.67)                                                                         |
|                  | Heart failure          | 11862 (0.27)                                       | 1464 (0.82)                                                   | 643 (0.42)                                                            | 532 (2.91)                                                        | 289 (5.17)                                                                         |
|                  | Myocarditis            | 125 (0)                                            | 73 (0.04)                                                     | 30 (0.02)                                                             | 26 (0.13)                                                         | 17 (0.28)                                                                          |
|                  | Tachycardia            | 12497 (0.29)                                       | 1710 (0.96)                                                   | 885 (0.57)                                                            | 511 (2.75)                                                        | 314 (5.45)                                                                         |
| Coagulation      | Thromboembolism        | 15795 (0.36)                                       | 2771 (1.57)                                                   | 1423 (0.93)                                                           | 821 (4.48)                                                        | 527 (9.23)                                                                         |
| Dermatologic     | Hair loss              | 2050 (0.05)                                        | 244 (0.13)                                                    | 204 (0.13)                                                            | 31 (0.16)                                                         | 9 (0.15)                                                                           |
|                  | Skin rash              | 33188 (0.77)                                       | 2333 (1.33)                                                   | 1790 (1.19)                                                           | 402 (2.18)                                                        | 141 (2.45)                                                                         |
| Endocrine        | Diabetes mellitus      | 61533 (1.83)                                       | 3570 (2.91)                                                   | 2709 (2.48)                                                           | 592 (5.64)                                                        | 269 (8.91)                                                                         |
|                  | Hyperlipidemia         | 254134 (7.84)                                      | 12959 (10.82)                                                 | 11056 (10.74)                                                         | 1377 (10.65)                                                      | 526 (13.38)                                                                        |
|                  | Obesity                | 78868 (1.98)                                       | 5496 (3.58)                                                   | 4327 (3.26)                                                           | 793 (5)                                                           | 376 (7.71)                                                                         |
| Gastrointestinal | Constipation           | 38889 (0.91)                                       | 3658 (2.13)                                                   | 2187 (1.46)                                                           | 1019 (5.91)                                                       | 452 (8.4)                                                                          |
|                  | Diarrhea               | 25255 (0.58)                                       | 2363 (1.36)                                                   | 1534 (1.02)                                                           | 563 (3.13)                                                        | 266 (4.69)                                                                         |
|                  | GERD                   | 110376 (3)                                         | 6965 (4.9)                                                    | 5182 (4.19)                                                           | 1272 (8.98)                                                       | 511 (11.68)                                                                        |
| General          | Fatigue                | 39788 (0.93)                                       | 4962 (2.89)                                                   | 2631 (1.76)                                                           | 1553 (9.3)                                                        | 778 (14.88)                                                                        |
| Kidney           | Acute kidney injury    | 23875 (0.55)                                       | 3307 (1.89)                                                   | 1237 (0.81)                                                           | 1257 (7.31)                                                       | 813 (15.49)                                                                        |
|                  | Chronic kidney disease | 131914 (3.47)                                      | 5662 (3.82)                                                   | 4486 (3.41)                                                           | 876 (6.73)                                                        | 300 (7.70)                                                                         |
| Mental health    | Anxiety                | 46434 (1.15)                                       | 4239 (2.67)                                                   | 2625 (1.9)                                                            | 985 (6.29)                                                        | 629 (12.77)                                                                        |
|                  | Depression             | 60262 (1.47)                                       | 4531 (2.8)                                                    | 3167 (2.26)                                                           | 999 (6.08)                                                        | 365 (7.01)                                                                         |
|                  | Mood disorder          | 56112 (1.4)                                        | 3708 (2.34)                                                   | 2886 (2.11)                                                           | 600 (3.58)                                                        | 222 (4.19)                                                                         |
|                  | Sleep disorder         | 135989 (4)                                         | 8995 (7.44)                                                   | 7037 (6.71)                                                           | 1417 (11.45)                                                      | 541 (14.59)                                                                        |
|                  | Substance abuse        | 85234 (2.21)                                       | 4134 (2.65)                                                   | 3165 (2.33)                                                           | 689 (4.47)                                                        | 280 (5.7)                                                                          |
| Musculoskeletal  | Joint pain             | 108830 (2.84)                                      | 6873 (4.67)                                                   | 5097 (3.96)                                                           | 1273 (9.01)                                                       | 503 (11.51)                                                                        |
|                  | Muscle weakness        | 26763 (0.62)                                       | 3703 (2.12)                                                   | 1817 (1.19)                                                           | 1249 (7.19)                                                       | 637 (11.79)                                                                        |

|            |                     |              |             |             |             |             |
|------------|---------------------|--------------|-------------|-------------|-------------|-------------|
| Neurologic | Headache            | 41186 (0.98) | 3161 (1.89) | 2573 (1.79) | 429 (2.4)   | 159 (2.84)  |
|            | Memory problems     | 32078 (0.75) | 2769 (1.63) | 1564 (1.05) | 821 (4.92)  | 384 (7.23)  |
|            | Smell problems      | 1691 (0.04)  | 356 (0.2)   | 279 (0.18)  | 49 (0.25)   | 28 (0.46)   |
|            | Stroke              | 16888 (0.39) | 1456 (0.83) | 880 (0.58)  | 380 (2.1)   | 196 (3.44)  |
| Pulmonary  | Cough               | 28088 (0.66) | 3041 (1.83) | 2290 (1.59) | 536 (3.13)  | 215 (4.04)  |
|            | Hypoxemia           | 9067 (0.21)  | 2017 (1.13) | 890 (0.58)  | 700 (3.72)  | 427 (7.37)  |
|            | Shortness of breath | 58454 (1.38) | 7627 (4.58) | 5176 (3.56) | 1653 (10.2) | 798 (16.03) |

Unadjusted number and percentage of incident clinical manifestation during the follow up are obtained within participants without the occurrence of event within one year before enrollment.

Supplementary Table 2: Risks and burdens of individual sequela in 30-day survivors of COVID-19

| Organ            | Sequelae               | Hazard Ratio<br>(95% CI) | Burden per 1000 persons at 6 months<br>(95% CI) |
|------------------|------------------------|--------------------------|-------------------------------------------------|
| Cardiovascular   | Chest pain             | 1.68 (1.62, 1.73)        | 13.84 (12.86, 14.76)                            |
|                  | Arrhythmias            | 1.59 (1.52, 1.66)        | 7.85 (7.08, 8.58)                               |
|                  | Acute coronary disease | 1.30 (1.25, 1.35)        | 6.18 (5.37, 6.96)                               |
|                  | Tachycardia            | 1.77 (1.65, 1.89)        | 4.69 (4.18, 5.21)                               |
|                  | Bradycardia            | 1.42 (1.32, 1.51)        | 2.63 (2.14, 3.1)                                |
|                  | Heart failure          | 1.40 (1.30, 1.5)         | 2.02 (1.67, 2.37)                               |
|                  | Myocarditis            | 7.91 (5.27, 11.53)       | 0.32 (0.23, 0.45)                               |
| Coagulation      | Thromboembolism        | 2.59 (2.46, 2.72)        | 11.35 (10.59, 12.12)                            |
| Dermatologic     | Skin rash              | 1.27 (1.21, 1.33)        | 3.3 (2.67, 3.89)                                |
|                  | Hair loss              | 1.93 (1.54, 2.37)        | 0.22 (0.17, 0.29)                               |
| Endocrine        | Hyperlipidemia         | 1.22 (1.19, 1.24)        | 17.09 (15.28, 18.79)                            |
|                  | Diabetes mellitus      | 1.39 (1.33, 1.44)        | 8.47 (7.46, 9.44)                               |
|                  | Obesity                | 1.28 (1.24, 1.32)        | 3.49 (3.06, 3.92)                               |
| Gastrointestinal | GERD                   | 1.33 (1.3, 1.37)         | 13.25 (11.97, 14.49)                            |
|                  | Constipation           | 1.41 (1.35, 1.47)        | 7.13 (6.33, 7.9)                                |
|                  | Diarrhea               | 1.48 (1.41, 1.56)        | 4.68 (4.09, 5.27)                               |
| General          | Fatigue                | 1.75 (1.68, 1.81)        | 13.59 (12.66, 14.49)                            |
| Kidney           | Chronic kidney disease | 1.18 (1.13, 1.23)        | 7.19 (5.78, 8.55)                               |
|                  | Acute kidney injury    | 1.41 (1.34, 1.48)        | 6.07 (5.46, 6.69)                               |
| Mental health    | Sleep disorders        | 1.41 (1.37, 1.44)        | 19.51 (18.05, 20.92)                            |
|                  | Anxiety                | 1.47 (1.41, 1.53)        | 8.75 (7.96, 9.55)                               |
|                  | Depression             | 1.37 (1.32, 1.42)        | 7.61 (6.8, 8.42)                                |
|                  | Mood disorder          | 1.31 (1.26, 1.36)        | 4.57 (3.93, 5.21)                               |
|                  | Substance abuse        | 1.16 (1.12, 1.2)         | 3.24 (2.55, 3.92)                               |
| Musculoskeletal  | Muscle weakness        | 1.82 (1.74, 1.9)         | 9.81 (9.05, 10.55)                              |
|                  | Joint pain             | 1.21 (1.18, 1.24)        | 8.92 (7.67, 10.1)                               |
| Neurologic       | Memory problems        | 1.56 (1.48, 1.63)        | 6.46 (5.78, 7.13)                               |
|                  | Headache               | 1.39 (1.33, 1.44)        | 3.8 (3.32, 4.28)                                |
|                  | Stroke                 | 1.5 (1.4, 1.59)          | 3.11 (2.6, 3.59)                                |
|                  | Smell problems         | 3.61 (3.15, 4.11)        | 1.34 (1.13, 1.56)                               |
| Pulmonary        | Shortness of breath    | 2.23 (2.17, 2.29)        | 28.8 (27.55, 29.97)                             |

|                                                                                                                                                                                                                                                                                                                                                                                                                                                                                                                      |           |                   |                     |
|----------------------------------------------------------------------------------------------------------------------------------------------------------------------------------------------------------------------------------------------------------------------------------------------------------------------------------------------------------------------------------------------------------------------------------------------------------------------------------------------------------------------|-----------|-------------------|---------------------|
|                                                                                                                                                                                                                                                                                                                                                                                                                                                                                                                      | Cough     | 2.02 (1.93, 2.10) | 10.24 (9.46, 10.98) |
|                                                                                                                                                                                                                                                                                                                                                                                                                                                                                                                      | Hypoxemia | 2.83 (2.65, 3.01) | 6.43 (5.94, 6.93)   |
| <p>Adjusted hazard ratio, adjusted burden per 1000 persons at 6 months of people with COVID-19 compared to users of the Veterans Health Administration. All users of the VHA served as the referent category. Outcomes were ascertained from day 30 after COVID-19 diagnosis until end of follow-up. For each outcome, cohort participants without history of the outcome in past one year were included in the analysis. Within each organ system, sequelae are ranked based on excess burden from high to low.</p> |           |                   |                     |



Supplementary Table 3: Unadjusted overall burden of Post-Acute Sequelae of SARS-CoV-2 infection (PASC) per 1000 persons at 6 months in the overall cohort and across care setting (non-hospitalized, hospitalized, and admitted to intensive care during the acute phase of the infection).

|                                                                                                                                                                                                                                                                                                | COVID-19 group<br>Unadjusted burden<br>per 1000 persons at<br>6 months (95% CI) | Users of the VHA<br>without COVID-19<br>Unadjusted burden<br>per 1000 persons at<br>6 months (95% CI) | Burden associated<br>with COVID-19†<br>Unadjusted burden<br>per 1000 persons at<br>6 months (95% CI) |
|------------------------------------------------------------------------------------------------------------------------------------------------------------------------------------------------------------------------------------------------------------------------------------------------|---------------------------------------------------------------------------------|-------------------------------------------------------------------------------------------------------|------------------------------------------------------------------------------------------------------|
| Overall                                                                                                                                                                                                                                                                                        | 237.38<br>(235.52, 239.37)                                                      | 88.96<br>(88.69, 89.19)                                                                               | 148.44<br>(146.59, 150.41)                                                                           |
| Non-hospitalized<br>COVID-19*                                                                                                                                                                                                                                                                  | 184.52<br>(182.51, 186.63)                                                      | 88.96<br>(88.69, 89.19)                                                                               | 95.57<br>(93.59, 97.69)                                                                              |
| Hospitalized COVID-<br>19*                                                                                                                                                                                                                                                                     | 518.56<br>(511.37, 525.09)                                                      | 88.96<br>(88.69, 89.19)                                                                               | 429.61<br>(422.34, 436.24)                                                                           |
| COVID-19 required<br>ICU*                                                                                                                                                                                                                                                                      | 702.28<br>(691.52, 712.38)                                                      | 88.96<br>(88.69, 89.19)                                                                               | 613.32<br>(602.67, 623.38)                                                                           |
| <p>*. Care settings during the first 30 days of infection.<br/>         †. Burden defined as having at least one sequela in excess of users of the Veterans Health Administration without COVID-19 after the first 30-days of infection. Burden was estimated based on Poisson regression.</p> |                                                                                 |                                                                                                       |                                                                                                      |

Supplementary Table 4: Adjusted burden of individual clinical manifestations per 1000 persons at 6 months in 1) users of Veterans Health Administration (VHA) without COVID-19, 2) Overall COVID-19 patients, 3) non-hospitalized COVID-19 patients, 4) hospitalized COVID-19 patients, and 5) COVID-19 patients admitted to intensive care

| Organ            | Clinical manifestations | Without COVID-19<br>Adjusted burden per 1000 persons at 6 months (95% CI) | Overall COVID-19<br>Adjusted burden per 1000 persons at 6 months (95% CI) | Non-hospitalized COVID-19<br>Adjusted burden per 1000 persons at 6 months (95% CI) | Hospitalized COVID-19<br>Adjusted burden per 1000 persons at 6 months (95% CI) | COVID-19 admitted to intensive care<br>Adjusted burden per 1000 persons at 6 months (95% CI) |
|------------------|-------------------------|---------------------------------------------------------------------------|---------------------------------------------------------------------------|------------------------------------------------------------------------------------|--------------------------------------------------------------------------------|----------------------------------------------------------------------------------------------|
| Kidney           | Acute kidney injury     | 9.60<br>(9.44, 9.76)                                                      | 16.52<br>(15.85, 17.21)                                                   | 11.08<br>(10.42, 11.72)                                                            | 39.83<br>(37.48, 42.16)                                                        | 88.42<br>(82.29, 94.76)                                                                      |
| Mental health    | Anxiety                 | 15.38<br>(15.17, 15.59)                                                   | 24.44<br>(23.64, 25.23)                                                   | 19.72<br>(18.86, 20.54)                                                            | 43.37<br>(40.49, 46.24)                                                        | 92.84<br>(85.5, 100.47)                                                                      |
| Cardiovascular   | Bradycardia             | 5.66<br>(5.53, 5.79)                                                      | 8.06<br>(7.57, 8.53)                                                      | 7.25<br>(6.7, 7.79)                                                                | 12.59<br>(11.17, 14.07)                                                        | 23.04<br>(19.72, 26.76)                                                                      |
| Cardiovascular   | Chest pain              | 19.56<br>(19.31, 19.8)                                                    | 33.59<br>(32.61, 34.51)                                                   | 30.49<br>(29.4, 31.53)                                                             | 48.12<br>(44.98, 51.23)                                                        | 51.44<br>(45.95, 57.35)                                                                      |
| Kidney           | Chronic kidney disease  | 31.80<br>(31.57, 32.03)                                                   | 39.63<br>(38.13, 41.11)                                                   | 33.34<br>(31.77, 34.86)                                                            | 71.13<br>(66.09, 76.17)                                                        | 118.68<br>(107.37, 130.65)                                                                   |
| Gastrointestinal | Constipation            | 14.94<br>(14.73, 15.14)                                                   | 22.34<br>(21.54, 23.11)                                                   | 18.75<br>(17.86, 19.61)                                                            | 39.13<br>(36.58, 41.68)                                                        | 58.37<br>(52.93, 64.13)                                                                      |
| Pulmonary        | Cough                   | 9.77<br>(9.59, 9.94)                                                      | 20.11<br>(19.33, 20.84)                                                   | 18.66<br>(17.78, 19.51)                                                            | 25.1<br>(22.83, 27.41)                                                         | 31.36<br>(27.08, 36.14)                                                                      |
| Mental health    | Depression              | 18.33<br>(18.1, 18.57)                                                    | 26.55<br>(25.73, 27.35)                                                   | 22.37<br>(21.47, 23.22)                                                            | 47.42<br>(44.28, 50.53)                                                        | 55.09<br>(49.36, 61.26)                                                                      |
| Gastrointestinal | Diarrhea                | 8.79<br>(8.63, 8.95)                                                      | 13.61<br>(13.02, 14.2)                                                    | 11.74<br>(11.07, 12.39)                                                            | 21.58<br>(19.68, 23.52)                                                        | 32.96<br>(28.94, 37.37)                                                                      |
| Endocrine        | Diabetes mellitus       | 21.49<br>(21.18, 21.8)                                                    | 29.38<br>(28.37, 30.35)                                                   | 27.36<br>(26.24, 28.43)                                                            | 49.39<br>(45.27, 53.59)                                                        | 75.63<br>(66.74, 85.24)                                                                      |
| General          | Fatigue                 | 15.82<br>(15.61, 16.02)                                                   | 29.26<br>(28.34, 30.16)                                                   | 23.82<br>(22.81, 24.79)                                                            | 60.45<br>(57.26, 63.6)                                                         | 102.24<br>(95.04, 109.7)                                                                     |
| Gastrointestinal | Gerd                    | 39.08<br>(38.7, 39.46)                                                    | 52.76<br>(51.48, 54)                                                      | 47.44<br>(46.02, 48.79)                                                            | 83.48<br>(78.75, 88.15)                                                        | 107.67<br>(98.4, 117.36)                                                                     |
| Dermatologic     | Hair loss               | 0.14<br>(0.11, 0.16)                                                      | 0.43<br>(0.37, 0.49)                                                      | 0.25<br>(0.2, 0.31)                                                                | 0.35<br>(0.19, 0.61)                                                           | 0.3<br>(0.09, 0.96)                                                                          |
| Neurologic       | Headache                | 8.84<br>(8.67, 9.01)                                                      | 13.19<br>(12.71, 13.67)                                                   | 11.62<br>(11.07, 12.15)                                                            | 15.43<br>(13.82, 17.1)                                                         | 19.64<br>(16.51, 23.2)                                                                       |
| Cardiovascular   | Arrhythmias             | 12.19<br>(12, 12.39)                                                      | 20.13<br>(19.35, 20.86)                                                   | 18.1<br>(17.23, 18.93)                                                             | 24.8<br>(22.62, 27.01)                                                         | 44.01<br>(38.96, 49.51)                                                                      |

|                 |                        |                         |                            |                            |                           |                            |
|-----------------|------------------------|-------------------------|----------------------------|----------------------------|---------------------------|----------------------------|
| Cardiovascular  | Heart failure          | 4.12<br>(4.01, 4.22)    | 5.83<br>(5.48, 6.18)       | 4.92<br>(4.52, 5.32)       | 12.98<br>(11.81, 14.18)   | 22.48<br>(19.86, 25.35)    |
| Endocrine       | Hyperlipidemia         | 86.19<br>(85.51, 86.86) | 103.99<br>(102.18, 105.69) | 103.19<br>(101.12, 105.14) | 102.01<br>(96.43, 107.56) | 128.56<br>(117.62, 139.87) |
| Pulmonary       | Hypoxemia              | 3<br>(2.91, 3.09)       | 9.3<br>(8.81, 9.8)         | 7.03<br>(6.52, 7.53)       | 21.86<br>(20.07, 23.67)   | 42.66<br>(38.55, 47.15)    |
| Musculoskeletal | Joint pain             | 41.44<br>(41.07, 41.82) | 50.57<br>(49.32, 51.75)    | 46.27<br>(44.87, 47.6)     | 77.27<br>(72.86, 81.63)   | 98.56<br>(90.02, 107.5)    |
| Neurologic      | Memory problems        | 10.4<br>(10.22, 10.57)  | 16.51<br>(15.83, 17.18)    | 14.16<br>(13.4, 14.89)     | 33.95<br>(31.5, 36.41)    | 49.44<br>(44.4, 54.81)     |
| Cardiovascular  | Acute coronary disease | 18.92<br>(18.66, 19.17) | 23.39<br>(22.58, 24.17)    | 21.86<br>(20.92, 22.75)    | 48.12<br>(44.9, 51.34)    | 75.24<br>(68.39, 82.48)    |
| Mental health   | Mood disorder          | 14<br>(13.78, 14.21)    | 19.07<br>(18.43, 19.71)    | 16.97<br>(16.26, 17.65)    | 27.61<br>(25.28, 29.97)   | 32.52<br>(28.15, 37.34)    |
| Musculoskeletal | Muscle weakness        | 10.61<br>(10.44, 10.78) | 20.21<br>(19.45, 20.95)    | 16.59<br>(15.76, 17.4)     | 42.92<br>(40.37, 45.45)   | 73.71<br>(67.93, 79.78)    |
| Cardiovascular  | Myocarditis            | 0.03<br>(0.03, 0.04)    | 0.36<br>(0.26, 0.49)       | 0.2<br>(0.13, 0.31)        | 1.06<br>(0.65, 1.69)      | 2.14<br>(1.21, 3.72)       |
| Endocrine       | Obesity                | 11.47<br>(11.22, 11.73) | 15.56<br>(15.13, 15.99)    | 13.63<br>(13.16, 14.07)    | 20.92<br>(19.36, 22.48)   | 30.99<br>(27.79, 34.41)    |
| Pulmonary       | Shortness of breath    | 21.95<br>(21.7, 22.2)   | 50.51<br>(49.27, 51.68)    | 44.14<br>(42.77, 45.43)    | 76.83<br>(72.92, 80.69)   | 122.15<br>(113.71, 130.83) |
| Dermatologic    | Skin rash              | 11.07<br>(10.89, 11.26) | 14.54<br>(13.91, 15.14)    | 13.45<br>(12.74, 14.14)    | 17.61<br>(15.78, 19.5)    | 19.13<br>(15.9, 22.85)     |
| Mental health   | Sleep disorder         | 48.43<br>(47.99, 48.87) | 68.81<br>(67.35, 70.22)    | 62.87<br>(61.24, 64.41)    | 97.22<br>(92.03, 102.33)  | 126.82<br>(116.29, 137.77) |
| Neurologic      | Smell problems         | 0.48<br>(0.44, 0.52)    | 1.82<br>(1.61, 2.04)       | 1.67<br>(1.44, 1.92)       | 1.78<br>(1.27, 2.44)      | 3.69<br>(2.45, 5.49)       |
| Neurologic      | Stroke                 | 5.98<br>(5.84, 6.11)    | 8.8<br>(8.29, 9.29)        | 8.11<br>(7.54, 8.68)       | 13.78<br>(12.33, 15.27)   | 24.13<br>(20.78, 27.86)    |
| Mental health   | Substance abuse        | 18.66<br>(18.41, 18.91) | 21.66<br>(20.97, 22.34)    | 19.79<br>(19.03, 20.51)    | 34.85<br>(32.12, 37.62)   | 44.29<br>(39.07, 49.94)    |
| Cardiovascular  | Tachycardia            | 4.74<br>(4.62, 4.85)    | 9.48<br>(8.97, 10)         | 7.14<br>(6.6, 7.67)        | 18.15<br>(16.45, 19.91)   | 36.78<br>(32.6, 41.34)     |
| Coagulation     | Thromboembolism        | 6.41<br>(6.27, 6.54)    | 17.57<br>(16.81, 18.34)    | 14.11<br>(13.3, 14.9)      | 34.77<br>(32.18, 37.39)   | 73.81<br>(67.51, 80.56)    |

Clinical manifestations were ascertained from 30 days after infection until end of follow-up.

Supplementary Table 5: Burden of Post-acute Sequelae of COVID-19 individual sequelae in the overall cohort and by age, race, sex, and health status

| Organ            | Sequelae               | Overall                 | Age                     |                         |                         | Race                    |                         |
|------------------|------------------------|-------------------------|-------------------------|-------------------------|-------------------------|-------------------------|-------------------------|
|                  |                        |                         | Age ≤ 60                | Age >60 - ≤ 70          | Age >70                 | Black                   | White                   |
| Pulmonary        | Shortness of breath    | 28.80<br>(27.55, 29.97) | 23.56<br>(21.94, 25.09) | 32.41<br>(29.76, 35.02) | 27.82<br>(25.81, 29.84) | 30.13<br>(27.69, 32.53) | 28.39<br>(26.86, 29.8)  |
| Mental health    | Sleep disorder         | 19.51<br>(18.05, 20.92) | 25.07<br>(22.08, 27.85) | 19.51<br>(16.12, 22.8)  | 19.38<br>(17.08, 21.71) | 17.32<br>(14.52, 20.14) | 20.48<br>(18.73, 22.16) |
| Endocrine        | Hyperlipidemia         | 17.09<br>(15.28, 18.79) | 21.85<br>(18.36, 25.1)  | 21.25<br>(16.86, 25.46) | 13.32<br>(10.58, 16.06) | 15.23<br>(11.98, 18.41) | 17.64<br>(15.39, 19.73) |
| Cardiovascular   | Chest pain             | 13.84<br>(12.86, 14.76) | 16.55<br>(14.94, 18.09) | 16.13<br>(13.88, 18.34) | 9.91<br>(8.49, 11.34)   | 16.46<br>(14.39, 18.5)  | 13.07<br>(11.94, 14.14) |
| General          | Fatigue                | 13.59<br>(12.66, 14.49) | 5.40<br>(4.46, 6.3)     | 12.87<br>(11.05, 14.73) | 22.79<br>(21.02, 24.6)  | 13.94<br>(12.13, 15.79) | 13.29<br>(12.19, 14.36) |
| Gastrointestinal | GERD                   | 13.25<br>(11.97, 14.49) | 8.41<br>(6.64, 10.09)   | 14.46<br>(11.71, 17.2)  | 17.8<br>(15.58, 20.05)  | 11.04<br>(8.71, 13.42)  | 14.11<br>(12.5, 15.65)  |
| Coagulation      | Thromboembolism        | 11.35<br>(10.59, 12.12) | 5.65<br>(4.84, 6.46)    | 12.55<br>(10.96, 14.22) | 15.66<br>(14.31, 17.07) | 13.32<br>(11.72, 15)    | 10.64<br>(9.76, 11.53)  |
| Pulmonary        | Cough                  | 10.24<br>(9.46, 10.98)  | 9.87<br>(8.71, 10.97)   | 13.37<br>(11.6, 15.12)  | 8.13<br>(6.95, 9.33)    | 12.37<br>(10.76, 13.99) | 9.37<br>(8.46, 10.24)   |
| Musculoskeletal  | Muscle weakness        | 9.81<br>(9.05, 10.55)   | 2.54<br>(1.9, 3.18)     | 8.45<br>(7.01, 9.97)    | 19.48<br>(17.89, 21.1)  | 10.89<br>(9.35, 12.48)  | 9.38<br>(8.49, 10.25)   |
| Musculoskeletal  | Joint pain             | 8.92<br>(7.67, 10.1)    | 6.52<br>(4.69, 8.27)    | 9.42<br>(6.64, 12.13)   | 11.47<br>(9.38, 13.58)  | 10.25<br>(7.67, 12.81)  | 8.42<br>(6.96, 9.81)    |
| Mental health    | Anxiety                | 8.75<br>(7.96, 9.55)    | 5.04<br>(3.84, 6.17)    | 11.03<br>(9.16, 12.98)  | 12.33<br>(10.96, 13.76) | 9.83<br>(8.2, 11.55)    | 8.52<br>(7.6, 9.44)     |
| Endocrine        | Diabetes mellitus      | 8.47<br>(7.46, 9.44)    | 4.67<br>(3.56, 5.74)    | 10.46<br>(8.2, 12.76)   | 11.07<br>(9.17, 13.01)  | 11.31<br>(9.03, 13.6)   | 7.29<br>(6.18, 8.35)    |
| Cardiovascular   | Arrhythmias            | 7.85<br>(7.08, 8.58)    | 8.06<br>(7, 9.08)       | 7<br>(5.48, 8.54)       | 6.81<br>(5.56, 8.09)    | 7.66<br>(6.21, 9.13)    | 7.83<br>(6.91, 8.72)    |
| Mental health    | Depression             | 7.61<br>(6.8, 8.42)     | 8.51<br>(6.93, 10.07)   | 8.19<br>(6.31, 10.14)   | 7.81<br>(6.53, 9.13)    | 7.93<br>(6.27, 9.65)    | 7.41<br>(6.47, 8.34)    |
| Kidney           | Chronic kidney disease | 7.19<br>(5.78, 8.55)    | 0.87<br>(0.18, 1.57)    | 6.53<br>(4.02, 9.11)    | 19.24<br>(15.43, 23.14) | 6.63<br>(4.74, 8.58)    | 7.52<br>(5.52, 9.43)    |
| Gastrointestinal | Constipation           | 7.13<br>(6.33, 7.9)     | 2.77<br>(1.94, 3.57)    | 5.81<br>(4.25, 7.4)     | 12.51<br>(10.98, 14.06) | 8.4<br>(6.73, 10.09)    | 6.67<br>(5.74, 7.56)    |
| Neurologic       | Memory problems        | 6.46<br>(5.78, 7.13)    | 1.91<br>(1.34, 2.47)    | 4.25<br>(3.08, 5.51)    | 14.63<br>(13.04, 16.26) | 5.93<br>(4.74, 7.17)    | 6.86<br>(6, 7.69)       |
| Pulmonary        | Hypoxemia              | 6.43                    | 2.72                    | 6.89                    | 10.25                   | 5.92                    | 6.84                    |

|                  |                        |                      |                      |                      |                         |                       |                      |
|------------------|------------------------|----------------------|----------------------|----------------------|-------------------------|-----------------------|----------------------|
|                  |                        | (5.94, 6.93)         | (2.24, 3.22)         | (5.94, 7.93)         | (9.32, 11.24)           | (5.02, 6.92)          | (6.21, 7.47)         |
| Cardiovascular   | Acute coronary disease | 6.18<br>(5.37, 6.96) | 1.12<br>(0.53, 1.73) | 6.84<br>(5.11, 8.64) | 15.07<br>(13.06, 17.08) | 5.63<br>(4.21, 7.11)  | 6.45<br>(5.38, 7.48) |
| Kidney           | Acute kidney injury    | 6.07<br>(5.46, 6.69) | 1.33<br>(0.81, 1.86) | 6.36<br>(5.15, 7.69) | 12.32<br>(11.12, 13.58) | 9.15<br>(7.74, 10.66) | 5.08<br>(4.41, 5.76) |
| Cardiovascular   | Tachycardia            | 4.69<br>(4.18, 5.21) | 4.04<br>(3.3, 4.77)  | 5.32<br>(4.24, 6.51) | 4.69<br>(3.91, 5.55)    | 5.75<br>(4.67, 6.92)  | 4.29<br>(3.71, 4.88) |
| Gastrointestinal | Diarrhea               | 4.68<br>(4.09, 5.27) | 4.62<br>(3.7, 5.52)  | 4.42<br>(3.21, 5.68) | 4.78<br>(3.82, 5.79)    | 5.15<br>(4, 6.33)     | 4.62<br>(3.88, 5.33) |
| Mental health    | Mood disorder          | 4.57<br>(3.93, 5.21) | 6.79<br>(5.27, 8.26) | 4.06<br>(2.67, 5.5)  | 4.78<br>(3.73, 5.87)    | 5.58<br>(4.11, 7.09)  | 4.04<br>(3.33, 4.75) |
| Neurologic       | Headache               | 3.80<br>(3.32, 4.28) | 7.09<br>(5.79, 8.35) | 5.6<br>(4.24, 6.97)  | 3<br>(2.19, 3.85)       | 5.24<br>(4.13, 6.39)  | 3.32<br>(2.78, 3.85) |
| Endocrine        | Obesity                | 3.49<br>(3.06, 3.92) | 5.57<br>(4.45, 6.63) | 5.11<br>(3.94, 6.29) | 2.67<br>(2.06, 3.29)    | 3.09<br>(2.22, 3.98)  | 3.78<br>(3.26, 4.29) |
| Dermatologic     | Skin rash              | 3.30<br>(2.67, 3.89) | 3.22<br>(2.32, 4.12) | 3.29<br>(2, 4.61)    | 3.3<br>(2.28, 4.34)     | 2.37<br>(1.29, 3.47)  | 3.66<br>(2.87, 4.42) |
| Mental health    | Substance abuse        | 3.24<br>(2.55, 3.92) | 3.43<br>(2.12, 4.66) | 4.22<br>(2.41, 6.05) | 2.59<br>(1.58, 3.62)    | 5.28<br>(3.71, 6.89)  | 2.35<br>(1.59, 3.1)  |
| Neurologic       | Stroke                 | 3.11<br>(2.6, 3.59)  | 0.83<br>(0.45, 1.24) | 3.24<br>(2.24, 4.29) | 5.44<br>(4.43, 6.5)     | 3.51<br>(2.51, 4.56)  | 2.94<br>(2.36, 3.51) |
| Cardiovascular   | Bradycardia            | 2.63<br>(2.14, 3.1)  | 1.43<br>(0.97, 1.91) | 2.26<br>(1.38, 3.22) | 4.17<br>(3.24, 5.16)    | 2.03<br>(1.18, 2.91)  | 2.89<br>(2.28, 3.49) |
| Cardiovascular   | Heart failure          | 2.02<br>(1.67, 2.37) | 0.2<br>(0.01, 0.41)  | 1.72<br>(1.05, 2.46) | 4.88<br>(4.08, 5.71)    | 2.07<br>(1.37, 2.82)  | 1.97<br>(1.56, 2.38) |
| Neurologic       | Smell problems         | 1.34<br>(1.13, 1.56) | 2.09<br>(1.67, 2.54) | 1.15<br>(0.75, 1.63) | 0.8<br>(0.54, 1.13)     | 0.88<br>(0.54, 1.3)   | 1.42<br>(1.17, 1.68) |
| Cardiovascular   | Myocarditis            | 0.32<br>(0.23, 0.45) | 0.22<br>(0.11, 0.38) | 0.3<br>(0.15, 0.57)  | 0.28<br>(0.16, 0.49)    | 0.29<br>(0.14, 0.55)  | 0.3<br>(0.2, 0.46)   |
| Dermatologic     | Hair loss              | 0.22<br>(0.17, 0.29) | 0.7<br>(0.48, 0.93)  | 0.27<br>(0.12, 0.47) | 0.06<br>(0.03, 0.11)    | 0.1<br>(0.01, 0.23)   | 0.29<br>(0.21, 0.37) |

| Organ         | Sequelae            | Overall                 | Sex                     |                         | Comorbidity             |                         |                         |
|---------------|---------------------|-------------------------|-------------------------|-------------------------|-------------------------|-------------------------|-------------------------|
|               |                     |                         | Male                    | Female                  | No comorbidities        | 1-3 comorbidities       | >3 comorbidities        |
| Pulmonary     | Shortness of breath | 28.8<br>(27.55, 29.97)  | 28.04<br>(26.74, 29.28) | 33.55<br>(29.64, 37.41) | 20.27<br>(18.96, 21.5)  | 29.79<br>(27.95, 31.63) | 37.5<br>(33.46, 41.72)  |
| Mental health | Sleep disorder      | 19.51<br>(18.05, 20.92) | 20.31<br>(18.77, 21.82) | 15.22<br>(10.43, 19.87) | 16.73<br>(14.94, 18.39) | 18.39<br>(16.13, 20.64) | 25.51<br>(20.91, 30.28) |
| Endocrine     | Hyperlipidemia      | 17.09<br>(15.28, 18.79) | 17.78<br>(15.87, 19.59) | 11.96<br>(6.26, 17.47)  | 19.99<br>(17.47, 22.32) | 14.29<br>(11.47, 17.02) | 8.89<br>(4.27, 13.65)   |

|                  |                        |                         |                         |                         |                         |                         |                         |
|------------------|------------------------|-------------------------|-------------------------|-------------------------|-------------------------|-------------------------|-------------------------|
| Cardiovascular   | Chest pain             | 13.84<br>(12.86, 14.76) | 13.49<br>(12.46, 14.46) | 18.01<br>(14.65, 21.37) | 11.16<br>(10.09, 12.21) | 13.44<br>(12.03, 14.84) | 12.75<br>(9.86, 15.82)  |
| General          | Fatigue                | 13.59<br>(12.66, 14.49) | 14.3<br>(13.31, 15.27)  | 7.21<br>(4.89, 9.62)    | 6.96<br>(6.13, 7.76)    | 15.2<br>(13.83, 16.6)   | 33.42<br>(29.67, 37.33) |
| Gastrointestinal | GERD                   | 13.25<br>(11.97, 14.49) | 14.16<br>(12.8, 15.49)  | 6.67<br>(2.83, 10.43)   | 8.96<br>(7.42, 10.44)   | 13.71<br>(11.74, 15.69) | 22.75<br>(18.73, 26.91) |
| Coagulation      | Thromboembolism        | 11.35<br>(10.59, 12.12) | 12.02<br>(11.2, 12.85)  | 5.02<br>(3.51, 6.72)    | 6.96<br>(6.2, 7.76)     | 12.62<br>(11.52, 13.78) | 18.39<br>(15.99, 20.95) |
| Pulmonary        | Cough                  | 10.24<br>(9.46, 10.98)  | 10.04<br>(9.22, 10.82)  | 13.29<br>(10.66, 15.95) | 8.57<br>(7.69, 9.43)    | 9.11<br>(8.02, 10.2)    | 9.77<br>(7.58, 12.14)   |
| Musculoskeletal  | Muscle weakness        | 9.81<br>(9.05, 10.55)   | 10.62<br>(9.81, 11.42)  | 2.85<br>(1.28, 4.56)    | 3.62<br>(3.04, 4.22)    | 12.2<br>(11.04, 13.4)   | 28.12<br>(24.86, 31.5)  |
| Musculoskeletal  | Joint pain             | 8.92<br>(7.67, 10.1)    | 9.65<br>(8.32, 10.92)   | 3.3<br>(-0.34, 6.93)    | 5.6<br>(4.22, 6.94)     | 9.65<br>(7.78, 11.5)    | 15.75<br>(11.5, 20.14)  |
| Mental health    | Anxiety                | 8.75<br>(7.96, 9.55)    | 9.2<br>(8.35, 10.06)    | 5.86<br>(3.3, 8.45)     | 4.84<br>(4.05, 5.61)    | 9.14<br>(7.99, 10.35)   | 18.4<br>(15.48, 21.45)  |
| Endocrine        | Diabetes mellitus      | 8.47<br>(7.46, 9.44)    | 9.18<br>(8.09, 10.25)   | 3.37<br>(1.29, 5.55)    | 8.11<br>(6.93, 9.24)    | 7.98<br>(6.18, 9.83)    | 10.59<br>(5.91, 15.81)  |
| Cardiovascular   | Arrhythmias            | 7.85<br>(7.08, 8.58)    | 7.51<br>(6.69, 8.28)    | 10.9<br>(8.37, 13.49)   | 6.76<br>(5.91, 7.58)    | 6.82<br>(5.75, 7.91)    | 8.11<br>(5.89, 10.54)   |
| Mental health    | Depression             | 7.61<br>(6.8, 8.42)     | 7.83<br>(6.97, 8.69)    | 7.25<br>(4.1, 10.41)    | 4.98<br>(4.07, 5.86)    | 7.98<br>(6.75, 9.23)    | 12.77<br>(10.13, 15.58) |
| Kidney           | Chronic kidney disease | 7.19<br>(5.78, 8.55)    | 7.84<br>(6.33, 9.31)    | 3.34<br>(0.12, 6.85)    | 3.60<br>(2.42, 4.75)    | 10.57<br>(8.08, 13.08)  | 20.17<br>(13.92, 26.75) |
| Gastrointestinal | Constipation           | 7.13<br>(6.33, 7.9)     | 7.29<br>(6.44, 8.11)    | 6.01<br>(3.44, 8.64)    | 3.31<br>(2.6, 3.99)     | 8.44<br>(7.27, 9.65)    | 14.74<br>(11.76, 17.87) |
| Neurologic       | Memory problems        | 6.46<br>(5.78, 7.13)    | 6.99<br>(6.25, 7.71)    | 2.05<br>(0.7, 3.54)     | 4.14<br>(3.48, 4.81)    | 6.44<br>(5.45, 7.46)    | 13.32<br>(10.85, 16.01) |
| Pulmonary        | Hypoxemia              | 6.43<br>(5.94, 6.93)    | 6.89<br>(6.37, 7.44)    | 2.39<br>(1.58, 3.37)    | 3.03<br>(2.6, 3.49)     | 7.69<br>(6.97, 8.46)    | 15.81<br>(13.81, 17.92) |
| Cardiovascular   | Acute coronary disease | 6.18<br>(5.37, 6.96)    | 7.22<br>(6.31, 8.12)    | 0.18<br>(-0.83, 1.36)   | 2.69<br>(2.03, 3.33)    | 8.05<br>(6.72, 9.4)     | 17.39<br>(13.74, 21.19) |
| Kidney           | Acute kidney injury    | 6.07<br>(5.46, 6.69)    | 6.92<br>(6.25, 7.61)    | 1.30<br>(0.36, 2.15)    | 2.62<br>(2.14, 3.14)    | 8.87<br>(7.91, 9.88)    | 25.07<br>(21.82, 28.42) |
| Cardiovascular   | Tachycardia            | 4.69<br>(4.18, 5.21)    | 4.63<br>(4.09, 5.19)    | 5.31<br>(3.64, 7.12)    | 2.83<br>(2.37, 3.34)    | 5.02<br>(4.29, 5.81)    | 8.18<br>(6.49, 10.01)   |
| Gastrointestinal | Diarrhea               | 4.68<br>(4.09, 5.27)    | 4.76<br>(4.13, 5.38)    | 4.62<br>(2.65, 6.68)    | 2.94<br>(2.39, 3.49)    | 4.44<br>(3.61, 5.3)     | 8.41<br>(6.28, 10.72)   |
| Mental           | Mood                   | 4.57                    | 4.71                    | 4.39                    | 3.87                    | 4.14                    | 7.1                     |

|                |                 |                      |                      |                        |                      |                      |                       |
|----------------|-----------------|----------------------|----------------------|------------------------|----------------------|----------------------|-----------------------|
| health         | disorder        | (3.93, 5.21)         | (4.04, 5.39)         | (1.9, 6.91)            | (3.01, 4.69)         | (3.16, 5.14)         | (5.17, 9.22)          |
| Neurologic     | Headache        | 3.8<br>(3.32, 4.28)  | 3.5<br>(2.98, 4.01)  | 11.44<br>(8.45, 14.46) | 3.74<br>(3.09, 4.36) | 3.45<br>(2.71, 4.21) | 4.14<br>(2.64, 5.79)  |
| Endocrine      | Obesity         | 3.49<br>(3.06, 3.92) | 3.54<br>(3.09, 3.99) | 4.25<br>(2.17, 6.3)    | 3.54<br>(2.99, 4.07) | 3.09<br>(2.43, 3.76) | 3.55<br>(2.18, 4.99)  |
| Dermatologic   | Skin rash       | 3.3<br>(2.67, 3.89)  | 3.05<br>(2.39, 3.68) | 5.77<br>(3.55, 8.04)   | 2.7<br>(1.99, 3.42)  | 3.39<br>(2.48, 4.29) | 2.56<br>(0.8, 4.45)   |
| Mental health  | Substance abuse | 3.24<br>(2.55, 3.92) | 3.53<br>(2.8, 4.26)  | 0.92<br>(-0.78, 2.68)  | 3.49<br>(2.57, 4.38) | 2.33<br>(1.31, 3.37) | 4.64<br>(2.64, 6.79)  |
| Neurologic     | Stroke          | 3.11<br>(2.6, 3.59)  | 3.31<br>(2.76, 3.84) | 1.46<br>(0.52, 2.58)   | 1.32<br>(0.9, 1.74)  | 3.69<br>(2.95, 4.46) | 6.53<br>(4.67, 8.55)  |
| Cardiovascular | Bradycardia     | 2.63<br>(2.14, 3.1)  | 2.73<br>(2.21, 3.24) | 1.67<br>(0.67, 2.84)   | 1.84<br>(1.35, 2.33) | 2.95<br>(2.28, 3.66) | 3.27<br>(1.74, 4.99)  |
| Cardiovascular | Heart failure   | 2.02<br>(1.67, 2.37) | 2.27<br>(1.88, 2.66) | 0.33<br>(-0.08, 0.9)   | 0.81<br>(0.57, 1.09) | 2.8<br>(2.25, 3.39)  | 9.12<br>(7.22, 11.16) |
| Neurologic     | Smell problems  | 1.34<br>(1.13, 1.56) | 1.28<br>(1.06, 1.51) | 1.7<br>(1.13, 2.39)    | 1.35<br>(1.07, 1.64) | 1.1<br>(0.82, 1.42)  | 0.89<br>(0.46, 1.47)  |
| Cardiovascular | Myocarditis     | 0.32<br>(0.23, 0.45) | 0.34<br>(0.23, 0.48) | 0<br>(0, 0.01)         | 0.11<br>(0.06, 0.19) | 0.2<br>(0.11, 0.34)  | 0.57<br>(0.29, 1.08)  |
| Dermatologic   | Hair loss       | 0.22<br>(0.17, 0.29) | 0.13<br>(0.08, 0.2)  | 3.59<br>(2.46, 4.84)   | 0.31<br>(0.21, 0.42) | 0.2<br>(0.12, 0.3)   | 0.1<br>(0, 0.27)      |

Post-acute sequelae were ascertained from 30 days after infection until end of follow-up. Estimates of burdens per 1000 COVID-19 patients at 6-months are presented.

Supplementary Table 6: Differences in burden of individual Post-acute Sequelae of COVID-19 by age, race, sex, and health status in the overall cohort

| Organ            | Sequelae               | Age >70 compare to Age ≤60 | Black compared to White | Male compared to Female | High comorbidity compared to low comorbidity |
|------------------|------------------------|----------------------------|-------------------------|-------------------------|----------------------------------------------|
| Kidney           | Acute kidney injury    | 11.00 (9.66, 12.38)        | 4.06 (2.49, 5.73)       | 5.63 (4.45, 6.73)       | 22.50 (19.14, 25.95)                         |
| Mental health    | Anxiety                | 7.31 (5.45, 9.21)          | 1.33 (-0.55, 3.26)      | 3.38 (0.58, 6.08)       | 13.55 (10.44, 16.79)                         |
| Cardiovascular   | Bradycardia            | 2.73 (1.74, 3.81)          | -0.87 (-1.86, 0.26)     | 1.07 (-0.18, 2.2)       | 1.45 (-0.15, 3.22)                           |
| Cardiovascular   | Chest pain             | -6.6 (-8.74, -4.54)        | 3.4 (0.96, 5.67)        | -4.51 (-7.99, -0.91)    | 1.65 (-1.59, 4.79)                           |
| Kidney           | Chronic kidney disease | 18.36 (14.43, 22.21)       | -0.89 (-3.71, 1.90)     | 4.5 (0.73, 8.13)        | 16.59 (10.10, 23.54)                         |
| Gastrointestinal | Constipation           | 9.76 (8.1, 11.52)          | 1.75 (-0.07, 3.7)       | 1.28 (-1.31, 4.02)      | 11.45 (8.44, 14.66)                          |
| Pulmonary        | Cough                  | -1.71 (-3.28, -0.12)       | 3 (1.32, 4.82)          | -3.25 (-5.9, -0.6)      | 1.2 (-1.07, 3.64)                            |
| Mental health    | Depression             | -0.66 (-2.6, 1.29)         | 0.56 (-1.27, 2.43)      | 0.6 (-2.56, 3.65)       | 7.82 (5.07, 10.67)                           |
| Gastrointestinal | Diarrhea               | 0.18 (-1.11, 1.41)         | 0.54 (-0.8, 1.92)       | 0.15 (-2.02, 2.07)      | 5.5 (3.32, 7.82)                             |
| Endocrine        | Diabetes mellitus      | 6.41 (4.21, 8.55)          | 4.04 (1.43, 6.53)       | 5.78 (3.41, 8.19)       | 2.52 (-2.44, 7.74)                           |
| General          | Fatigue                | 17.39 (15.43, 19.41)       | 0.63 (-1.44, 2.85)      | 7.1 (4.47, 9.55)        | 26.45 (22.7, 30.45)                          |
| Gastrointestinal | Gerd                   | 9.49 (6.61, 12.27)         | -3.01 (-5.91, -0.17)    | 7.56 (3.38, 11.59)      | 13.84 (9.56, 18.24)                          |
| Dermatologic     | Hair loss              | -0.63 (-0.87, -0.41)       | -0.18 (-0.31, -0.03)    | -3.46 (-4.72, -2.31)    | -0.2 (-0.36, -0.02)                          |
| Neurologic       | Headache               | -4.09 (-5.6, -2.5)         | 1.92 (0.63, 3.2)        | -7.94 (-10.88, -4.94)   | 0.4 (-1.28, 2.25)                            |
| Cardiovascular   | Arrhythmias            | -1.24 (-2.95, 0.38)        | -0.17 (-1.94, 1.55)     | -3.37 (-6.13, -0.73)    | 1.42 (-1.17, 3.86)                           |
| Cardiovascular   | Heart failure          | 4.67 (3.87, 5.51)          | 0.09 (-0.71, 0.95)      | 1.93 (1.28, 2.51)       | 8.3 (6.36, 10.39)                            |
| Endocrine        | Hyperlipidemia         | -8.5 (-12.92, -4.1)        | -2.47 (-6.43, 1.44)     | 5.85 (0.16, 11.94)      | -11.04 (-16.32, -5.93)                       |
| Pulmonary        | Hypoxemia              | 7.53 (6.52, 8.6)           | -0.91 (-1.98, 0.22)     | 4.5 (3.42, 5.48)        | 12.81 (10.74, 15.01)                         |
| Musculoskeletal  | Joint pain             | 4.92 (2.23, 7.65)          | 1.76 (-1.1, 4.54)       | 6.38 (2.63, 10.21)      | 10.1 (5.76, 14.66)                           |
| Neurologic       | Memory problems        | 12.75 (11.06, 14.44)       | -0.96 (-2.34, 0.6)      | 4.92 (3.32, 6.54)       | 9.18 (6.67, 11.93)                           |
| Cardiovascular   | Acute coronary disease | 13.93 (11.87, 16.02)       | -0.83 (-2.52, 0.94)     | 7.05 (5.53, 8.35)       | 14.66 (11.03, 18.55)                         |
| Mental health    | Mood disorder          | -1.98 (-3.82, -0.18)       | 1.56 (-0.05, 3.15)      | 0.34 (-2.24, 2.92)      | 3.29 (1.19, 5.51)                            |
| Musculoskeletal  | Muscle weakness        | 16.96 (15.16, 18.69)       | 1.53 (-0.33, 3.39)      | 7.81 (5.75, 9.64)       | 24.47 (21, 28.02)                            |
| Cardiovascular   | Myocarditis            | 0.07 (-0.14, 0.3)          | -0.02 (-0.23, 0.27)     | 0.34 (0.23, 0.48)       | 0.46 (0.17, 0.97)                            |



|                |                     |                      |                      |                      |                     |
|----------------|---------------------|----------------------|----------------------|----------------------|---------------------|
| Endocrine      | Obesity             | -2.88 (-4.16, -1.68) | -0.69 (-1.69, 0.26)  | -0.67 (-2.86, 1.38)  | 0.01 (-1.49, 1.55)  |
| Pulmonary      | Shortness of breath | 4.28 (1.67, 6.92)    | 1.74 (-1.16, 4.71)   | -5.46 (-9.47, -1.41) | 17.26 (13.1, 21.53) |
| Dermatologic   | Skin rash           | 0.1 (-1.27, 1.54)    | -1.29 (-2.63, 0.08)  | -2.7 (-5.1, -0.41)   | -0.14 (-2.06, 1.9)  |
| Mental health  | Sleep disorder      | -5.59 (-9.45, -2)    | -3.22 (-6.5, 0.17)   | 5.19 (0.11, 9.96)    | 8.77 (3.69, 14.03)  |
| Neurologic     | Smell problems      | -1.27 (-1.8, -0.75)  | -0.54 (-0.97, -0.06) | -0.41 (-1.14, 0.19)  | -0.45 (-0.99, 0.18) |
| Neurologic     | Stroke              | 4.61 (3.53, 5.71)    | 0.57 (-0.6, 1.76)    | 1.83 (0.59, 2.94)    | 5.21 (3.28, 7.25)   |
| Mental health  | Substance abuse     | -0.83 (-2.34, 0.76)  | 2.92 (1.26, 4.73)    | 2.61 (0.82, 4.47)    | 1.13 (-1, 3.49)     |
| Cardiovascular | Tachycardia         | 0.68 (-0.51, 1.8)    | 1.46 (0.17, 2.77)    | -0.68 (-2.5, 1.03)   | 5.34 (3.47, 7.31)   |
| Coagulation    | Thromboembolism     | 10.04 (8.34, 11.68)  | 2.71 (0.82, 4.56)    | 7.01 (4.97, 8.67)    | 11.46 (8.88, 14.2)  |

Differences in burden per 1000 COVID-19 patients and 95% confidence intervals at 6-months are presented.

Supplementary Table 7: Burden of Post-acute Sequelae of COVID-19 individual sequelae in the overall cohort and by age, race, sex, and health status in non-hospitalized COVID-19

| Organ            | Sequelae               | Overall                 | Age                     |                         |                         | Race                    |                         |
|------------------|------------------------|-------------------------|-------------------------|-------------------------|-------------------------|-------------------------|-------------------------|
|                  |                        |                         | Age ≤ 60                | Age >60 - ≤ 70          | Age >70                 | Black                   | White                   |
| Pulmonary        | Shortness of breath    | 23.29<br>(21.99, 24.52) | 21.28<br>(19.64, 22.85) | 25.41<br>(22.63, 28.1)  | 18.31<br>(16.22, 20.32) | 23.37<br>(20.8, 25.86)  | 23.35<br>(21.77, 24.85) |
| Mental health    | Sleep disorder         | 14.16<br>(12.62, 15.6)  | 22.09<br>(19.03, 24.98) | 13.78<br>(10.17, 17.28) | 11.26<br>(8.8, 13.63)   | 12.64<br>(9.63, 15.52)  | 14.64<br>(12.82, 16.35) |
| Endocrine        | Hyperlipidemia         | 16.18<br>(14.23, 18.01) | 21.46<br>(17.87, 24.85) | 19.94<br>(15.11, 24.53) | 11.89<br>(8.8, 14.83)   | 14.49<br>(10.89, 17.92) | 16.68<br>(14.28, 18.93) |
| Cardiovascular   | Chest pain             | 11.38<br>(10.34, 12.36) | 14.72<br>(13.08, 16.3)  | 13.33<br>(10.9, 15.71)  | 6.66<br>(5.1, 8.19)     | 12.46<br>(10.26, 14.61) | 11.08<br>(9.9, 12.22)   |
| General          | Fatigue                | 7.79<br>(6.85, 8.7)     | 4.18<br>(3.24, 5.12)    | 6.83<br>(4.97, 8.69)    | 10.77<br>(8.98, 12.51)  | 7.19<br>(5.33, 9.03)    | 7.9<br>(6.77, 8.98)     |
| Gastrointestinal | GERD                   | 7.9<br>(6.56, 9.17)     | 7.21<br>(5.39, 8.95)    | 8.85<br>(5.95, 11.66)   | 7.17<br>(4.86, 9.4)     | 5.75<br>(3.27, 8.17)    | 8.61<br>(6.95, 10.19)   |
| Coagulation      | Thromboembolism        | 7.36<br>(6.6, 8.09)     | 3.88<br>(3.1, 4.68)     | 7.49<br>(5.96, 9.06)    | 9.71<br>(8.35, 11.06)   | 8.12<br>(6.54, 9.73)    | 7.06<br>(6.19, 7.91)    |
| Pulmonary        | Cough                  | 9.11<br>(8.29, 9.91)    | 9.26<br>(8.08, 10.42)   | 12.35<br>(10.43, 14.27) | 6.22<br>(4.93, 7.5)     | 10.92<br>(9.19, 12.66)  | 8.45<br>(7.49, 9.38)    |
| Musculoskeletal  | Muscle weakness        | 5.57<br>(4.8, 6.32)     | 1.72<br>(1.08, 2.37)    | 3.66<br>(2.22, 5.12)    | 10.32<br>(8.7, 11.89)   | 5.77<br>(4.18, 7.36)    | 5.52<br>(4.61, 6.4)     |
| Musculoskeletal  | Joint pain             | 4.38<br>(3.06, 5.61)    | 4.39<br>(2.52, 6.18)    | 4.82<br>(1.85, 7.7)     | 3.99<br>(1.77, 6.14)    | 5.38<br>(2.59, 8.08)    | 4.02<br>(2.51, 5.47)    |
| Mental health    | Anxiety                | 4.14<br>(3.34, 4.9)     | 3.25<br>(2.04, 4.41)    | 5.83<br>(3.89, 7.76)    | 5.12<br>(3.72, 6.51)    | 4.24<br>(2.59, 5.87)    | 4.3<br>(3.37, 5.19)     |
| Endocrine        | Diabetes mellitus      | 5.51<br>(4.47, 6.5)     | 3.26<br>(2.15, 4.34)    | 6.51<br>(4.19, 8.82)    | 6.34<br>(4.38, 8.25)    | 7.31<br>(4.93, 9.65)    | 4.7<br>(3.57, 5.79)     |
| Cardiovascular   | Arrhythmias            | 6.37<br>(5.55, 7.16)    | 7.38<br>(6.3, 8.44)     | 5.12<br>(3.51, 6.74)    | 4.26<br>(2.92, 5.59)    | 5.99<br>(4.4, 7.57)     | 6.5<br>(5.53, 7.45)     |
| Mental health    | Depression             | 3.95<br>(3.11, 4.74)    | 6.63<br>(5.01, 8.19)    | 3.4<br>(1.44, 5.35)     | 2.56<br>(1.24, 3.86)    | 3.68<br>(1.93, 5.39)    | 3.92<br>(2.97, 4.84)    |
| Kidney           | Chronic kidney disease | 1.66<br>(0.19, 3.08)    | 0.43<br>(-0.28, 1.15)   | 0.92<br>(-1.68, 3.54)   | 2.13<br>(-1.83, 5.99)   | 1.11<br>(-0.84, 3.06)   | 2.11<br>(0.03, 4.13)    |
| Gastrointestinal | Constipation           | 3.91<br>(3.07, 4.71)    | 1.89<br>(1.05, 2.73)    | 2.2<br>(0.56, 3.85)     | 6.57<br>(4.96, 8.14)    | 4.6<br>(2.8, 6.38)      | 3.55<br>(2.59, 4.48)    |
| Neurologic       | Memory problems        | 3.51<br>(2.81, 4.19)    | 1.34<br>(0.78, 1.92)    | 1.25<br>(0.07, 2.47)    | 7.28<br>(5.66, 8.88)    | 2.79<br>(1.56, 4.06)    | 4.02<br>(3.14, 4.88)    |
| Pulmonary        | Hypoxemia              | 3.82                    | 1.81                    | 3.85                    | 5.31                    | 3.05                    | 4.31                    |

|                  |                        | (3.35, 4.29)            | (1.37, 2.28)            | (2.94, 4.8)            | (4.41, 6.21)            | (2.22, 3.95)            | (3.7, 4.92)             |
|------------------|------------------------|-------------------------|-------------------------|------------------------|-------------------------|-------------------------|-------------------------|
| Cardiovascular   | Acute coronary disease | 2.55<br>(1.71, 3.35)    | 0.46<br>(-0.14, 1.06)   | 1.73<br>(-0.03, 3.49)  | 5.79<br>(3.74, 7.77)    | 1.58<br>(0.1, 3.07)     | 3.04<br>(1.93, 4.11)    |
| Kidney           | Acute kidney injury    | 1.28<br>(0.68, 1.86)    | 0.38<br>(-0.14, 0.92)   | 0.88<br>(-0.31, 2.11)  | 2.29<br>(1.12, 3.44)    | 1.47<br>(0.09, 2.88)    | 1.02<br>(0.36, 1.66)    |
| Cardiovascular   | Tachycardia            | 2.57<br>(2.06, 3.07)    | 2.87<br>(2.14, 3.61)    | 2.67<br>(1.57, 3.83)   | 1.88<br>(1.08, 2.71)    | 2.31<br>(1.25, 3.42)    | 2.58<br>(2, 3.17)       |
| Gastrointestinal | Diarrhea               | 2.98<br>(2.35, 3.58)    | 3.89<br>(2.96, 4.82)    | 2.2<br>(0.94, 3.49)    | 2.16<br>(1.14, 3.19)    | 3.66<br>(2.41, 4.93)    | 2.92<br>(2.15, 3.66)    |
| Mental health    | Mood disorder          | 2.94<br>(2.27, 3.58)    | 5.86<br>(4.3, 7.36)     | 2.09<br>(0.62, 3.58)   | 2.56<br>(1.44, 3.68)    | 3.94<br>(2.37, 5.49)    | 2.49<br>(1.76, 3.19)    |
| Neurologic       | Headache               | 3.06<br>(2.55, 3.55)    | 6.27<br>(4.93, 7.56)    | 4.84<br>(3.36, 6.32)   | 2.23<br>(1.34, 3.15)    | 4.46<br>(3.27, 5.64)    | 2.58<br>(2.02, 3.12)    |
| Endocrine        | Obesity                | 2.22<br>(1.76, 2.64)    | 4.56<br>(3.41, 5.66)    | 3.22<br>(1.98, 4.43)   | 1.12<br>(0.49, 1.75)    | 1.19<br>(0.29, 2.08)    | 2.68<br>(2.14, 3.2)     |
| Dermatologic     | Skin rash              | 2.64<br>(1.96, 3.29)    | 2.7<br>(1.77, 3.62)     | 2.47<br>(1.06, 3.9)    | 2.59<br>(1.44, 3.74)    | 1.79<br>(0.61, 2.99)    | 2.95<br>(2.11, 3.76)    |
| Mental health    | Substance abuse        | 0.98<br>(0.27, 1.65)    | 2.14<br>(0.82, 3.41)    | 0.34<br>(-1.54, 2.19)  | 0.08<br>(-0.98, 1.14)   | 1.85<br>(0.21, 3.46)    | 0.49<br>(-0.29, 1.23)   |
| Neurologic       | Stroke                 | 2.08<br>(1.55, 2.61)    | 0.51<br>(0.13, 0.92)    | 1.93<br>(0.88, 3.03)   | 3.6<br>(2.5, 4.7)       | 1.8<br>(0.73, 2.91)     | 2.09<br>(1.48, 2.71)    |
| Cardiovascular   | Bradycardia            | 1.6<br>(1.09, 2.11)     | 1.2<br>(0.73, 1.7)      | 1.24<br>(0.32, 2.24)   | 1.82<br>(0.84, 2.82)    | 1.19<br>(0.27, 2.17)    | 1.77<br>(1.13, 2.41)    |
| Cardiovascular   | Heart failure          | 0.75<br>(0.38, 1.11)    | 0.02<br>(-0.17, 0.24)   | 0.32<br>(-0.35, 1.05)  | 1.83<br>(1.01, 2.66)    | 0.4<br>(-0.32, 1.18)    | 0.81<br>(0.39, 1.23)    |
| Neurologic       | Smell problems         | 1.25<br>(1.03, 1.47)    | 2.01<br>(1.59, 2.46)    | 1.04<br>(0.63, 1.55)   | 0.63<br>(0.35, 0.97)    | 0.78<br>(0.42, 1.22)    | 1.3<br>(1.04, 1.57)     |
| Cardiovascular   | Myocarditis            | 0.17<br>(0.1, 0.26)     | 0.16<br>(0.07, 0.31)    | 0.11<br>(0.03, 0.29)   | 0.12<br>(0.04, 0.27)    | 0.12<br>(0.03, 0.32)    | 0.17<br>(0.09, 0.29)    |
| Dermatologic     | Hair loss              | 0.19<br>(0.13, 0.25)    | 0.59<br>(0.38, 0.83)    | 0.26<br>(0.1, 0.46)    | 0.06<br>(0.02, 0.11)    | 0.03<br>(-0.07, 0.14)   | 0.26<br>(0.19, 0.33)    |
| Organ            | Sequelae               | Overall                 | Sex                     |                        | Comorbidity             |                         |                         |
|                  |                        |                         | Male                    | Female                 | No comorbidities        | 1-3 comorbidities       | >3 comorbidities        |
| Pulmonary        | Shortness of breath    | 23.29<br>(21.99, 24.52) | 22.19<br>(20.82, 23.48) | 30.24<br>(26.3, 34.16) | 17.64<br>(16.33, 18.9)  | 21.79<br>(19.92, 23.59) | 18.72<br>(14.25, 23.09) |
| Mental health    | Sleep disorder         | 14.16<br>(12.62, 15.6)  | 14.44<br>(12.81, 15.98) | 13.72<br>(8.82, 18.51) | 13.85<br>(12.04, 15.57) | 12.21<br>(9.82, 14.49)  | 10.51<br>(5.3, 15.62)   |
| Endocrine        | Hyperlipidemia         | 16.18<br>(14.23, 18.01) | 17.01<br>(14.93, 18.95) | 10.47<br>(4.61, 16.14) | 19.18<br>(16.58, 21.62) | 12.17<br>(9.11, 15.06)  | 6.9<br>(1.26, 12.37)    |

|                  |                        |                         |                        |                         |                      |                       |                       |
|------------------|------------------------|-------------------------|------------------------|-------------------------|----------------------|-----------------------|-----------------------|
| Cardiovascular   | Chest pain             | 11.38<br>(10.34, 12.36) | 10.94<br>(9.85, 11.98) | 16.14<br>(12.71, 19.56) | 9.9<br>(8.81, 10.95) | 9.65<br>(8.18, 11.08) | 7.22<br>(3.83, 10.59) |
| General          | Fatigue                | 7.79<br>(6.85, 8.7)     | 8.01<br>(6.99, 8.97)   | 5.48<br>(3.12, 7.95)    | 4.93<br>(4.12, 5.72) | 7.19<br>(5.87, 8.49)  | 9.86<br>(5.87, 13.81) |
| Gastrointestinal | GERD                   | 7.9<br>(6.56, 9.17)     | 8.37<br>(6.94, 9.72)   | 4.91<br>(0.99, 8.81)    | 7.26<br>(5.7, 8.76)  | 7.35<br>(5.3, 9.31)   | 5.49<br>(1.08, 9.85)  |
| Coagulation      | Thromboembolism        | 7.36<br>(6.6, 8.09)     | 7.71<br>(6.9, 8.49)    | 3.42<br>(1.97, 5.09)    | 4.65<br>(3.94, 5.37) | 7.05<br>(6, 8.09)     | 8.7<br>(6.17, 11.3)   |
| Pulmonary        | Cough                  | 9.11<br>(8.29, 9.91)    | 8.9<br>(8.02, 9.75)    | 12.25<br>(9.56, 15)     | 7.91<br>(7.02, 8.78) | 7.43<br>(6.27, 8.56)  | 6.73<br>(4.17, 9.37)  |
| Musculoskeletal  | Muscle weakness        | 5.57<br>(4.8, 6.32)     | 5.98<br>(5.15, 6.79)   | 1.69<br>(0.11, 3.45)    | 2.01<br>(1.46, 2.58) | 6.45<br>(5.32, 7.56)  | 9.59<br>(6.13, 13.05) |
| Musculoskeletal  | Joint pain             | 4.38<br>(3.06, 5.61)    | 4.83<br>(3.43, 6.16)   | 1.08<br>(-2.63, 4.76)   | 3.46<br>(2.06, 4.8)  | 4.55<br>(2.59, 6.43)  | 1.62<br>(-3.17, 6.33) |
| Mental health    | Anxiety                | 4.14<br>(3.34, 4.9)     | 4.34<br>(3.48, 5.16)   | 3.54<br>(0.97, 6.14)    | 2.73<br>(1.98, 3.47) | 3.88<br>(2.73, 5)     | 4.79<br>(1.64, 7.96)  |
| Endocrine        | Diabetes mellitus      | 5.51<br>(4.47, 6.5)     | 5.87<br>(4.75, 6.94)   | 2.44<br>(0.33, 4.65)    | 5.73<br>(4.54, 6.87) | 4.54<br>(2.66, 6.38)  | 2.93<br>(-2.35, 8.68) |
| Cardiovascular   | Arrhythmias            | 6.37<br>(5.55, 7.16)    | 5.9<br>(5.04, 6.74)    | 10.24<br>(7.64, 12.9)   | 6.16<br>(5.29, 7.01) | 4.78<br>(3.65, 5.88)  | 2.78<br>(0.22, 5.39)  |
| Mental health    | Depression             | 3.95<br>(3.11, 4.74)    | 4.03<br>(3.14, 4.89)   | 4.86<br>(1.67, 8.04)    | 3.28<br>(2.37, 4.17) | 3.88<br>(2.63, 5.1)   | 2.44<br>(-0.44, 5.35) |
| Kidney           | Chronic kidney disease | 1.66<br>(0.19, 3.08)    | 1.55<br>(-0.03, 3.06)  | 2.86<br>(-0.49, 6.57)   | 1.82<br>(0.63, 3.01) | 1.61<br>(-0.92, 4.08) | 1.66<br>(-1.75, 5.03) |
| Gastrointestinal | Constipation           | 3.91<br>(3.07, 4.71)    | 3.81<br>(2.92, 4.68)   | 4.83<br>(2.19, 7.53)    | 2.08<br>(1.38, 2.78) | 4.09<br>(2.9, 5.26)   | 4.28<br>(0.92, 7.64)  |
| Neurologic       | Memory problems        | 3.51<br>(2.81, 4.19)    | 3.76<br>(3.01, 4.5)    | 1.07<br>(-0.28, 2.59)   | 2.6<br>(1.95, 3.26)  | 2.44<br>(1.47, 3.4)   | 5.45<br>(2.67, 8.28)  |
| Pulmonary        | Hypoxemia              | 3.82<br>(3.35, 4.29)    | 4.02<br>(3.52, 4.52)   | 1.67<br>(0.89, 2.64)    | 1.87<br>(1.5, 2.26)  | 3.67<br>(3.03, 4.33)  | 6.87<br>(4.89, 8.94)  |
| Cardiovascular   | Acute coronary disease | 2.55<br>(1.71, 3.35)    | 2.94<br>(2, 3.84)      | -0.14<br>(-1.18, 1.08)  | 1.43<br>(0.78, 2.09) | 2.39<br>(1.07, 3.68)  | 4.55<br>(0.58, 8.51)  |
| Kidney           | Acute kidney injury    | 1.28<br>(0.68, 1.86)    | 1.47<br>(0.82, 2.11)   | 0.31<br>(-0.69, 1.11)   | 0.86<br>(0.43, 1.31) | 1.51<br>(0.63, 2.39)  | 0.72<br>(-2.55, 3.99) |
| Cardiovascular   | Tachycardia            | 2.57<br>(2.06, 3.07)    | 2.4<br>(1.87, 2.93)    | 4.1<br>(2.44, 5.91)     | 1.61<br>(1.18, 2.06) | 2.49<br>(1.77, 3.22)  | 2.11<br>(0.35, 3.98)  |
| Gastrointestinal | Diarrhea               | 2.98<br>(2.35, 3.58)    | 2.95<br>(2.28, 3.6)    | 3.72<br>(1.71, 5.85)    | 2.36<br>(1.81, 2.91) | 2.25<br>(1.41, 3.08)  | 2.05<br>(-0.34, 4.51) |
| Mental           | Mood                   | 2.94                    | 2.97                   | 3.67                    | 3.09                 | 2.25                  | 3.7                   |

|                |                 |                      |                      |                        |                      |                      |                       |
|----------------|-----------------|----------------------|----------------------|------------------------|----------------------|----------------------|-----------------------|
| health         | disorder        | (2.27, 3.58)         | (2.26, 3.65)         | (1.1, 6.26)            | (2.23, 3.93)         | (1.22, 3.26)         | (1.46, 5.99)          |
| Neurologic     | Headache        | 3.06<br>(2.55, 3.55) | 2.78<br>(2.24, 3.31) | 10.15<br>(7.09, 13.19) | 3.34<br>(2.67, 3.98) | 2.53<br>(1.74, 3.3)  | 2.79<br>(1.01, 4.65)  |
| Endocrine      | Obesity         | 2.22<br>(1.76, 2.64) | 2.15<br>(1.68, 2.6)  | 3.89<br>(1.74, 6.01)   | 2.75<br>(2.19, 3.28) | 1.65<br>(0.96, 2.31) | -0.13<br>(-1.65, 1.4) |
| Dermatologic   | Skin rash       | 2.64<br>(1.96, 3.29) | 2.38<br>(1.66, 3.07) | 5.09<br>(2.81, 7.44)   | 2.27<br>(1.54, 2.99) | 2.4<br>(1.44, 3.36)  | 1.63<br>(-0.49, 3.83) |
| Mental health  | Substance abuse | 0.98<br>(0.27, 1.65) | 1.13<br>(0.37, 1.85) | -0.13<br>(-1.85, 1.64) | 1.69<br>(0.78, 2.56) | 0.17<br>(-0.89, 1.2) | 0.18<br>(-2.09, 2.5)  |
| Neurologic     | Stroke          | 2.08<br>(1.55, 2.61) | 2.14<br>(1.56, 2.71) | 1.36<br>(0.39, 2.54)   | 0.75<br>(0.35, 1.18) | 2.38<br>(1.61, 3.15) | 3.26<br>(1.13, 5.48)  |
| Cardiovascular | Bradycardia     | 1.6<br>(1.09, 2.11)  | 1.58<br>(1.04, 2.12) | 1.43<br>(0.42, 2.65)   | 1.38<br>(0.9, 1.89)  | 1.45<br>(0.77, 2.15) | 0.35<br>(-1.42, 2.22) |
| Cardiovascular | Heart failure   | 0.75<br>(0.38, 1.11) | 0.81<br>(0.41, 1.21) | 0.21<br>(-0.21, 0.81)  | 0.43<br>(0.2, 0.69)  | 0.84<br>(0.3, 1.39)  | 1.09<br>(-0.93, 3.19) |
| Neurologic     | Smell problems  | 1.25<br>(1.03, 1.47) | 1.19<br>(0.96, 1.44) | 1.56<br>(1, 2.26)      | 1.27<br>(1, 1.57)    | 0.96<br>(0.68, 1.29) | 0.49<br>(0.06, 1.1)   |
| Cardiovascular | Myocarditis     | 0.17<br>(0.1, 0.26)  | 0.17<br>(0.1, 0.28)  | 0<br>(0, 0.01)         | 0.06<br>(0.02, 0.12) | 0.09<br>(0.03, 0.19) | 0.21<br>(0.06, 0.54)  |
| Dermatologic   | Hair loss       | 0.19<br>(0.13, 0.25) | 0.11<br>(0.06, 0.18) | 3.12<br>(1.99, 4.37)   | 0.28<br>(0.18, 0.38) | 0.14<br>(0.05, 0.23) | 0.12<br>(0.01, 0.31)  |

Post-acute sequelae were ascertained from 30 days after infection until end of follow-up. Estimates of burdens per 1000 COVID-19 patients at 6-months are presented.

Supplementary Table 8: Burden of Post-acute Sequelae of COVID-19 individual sequelae in the overall cohort and by age, race, sex, and health status in hospitalized COVID-19

| Organ            | Sequelae               | Overall                 | Age                     |                         |                         | Race                    |                         |
|------------------|------------------------|-------------------------|-------------------------|-------------------------|-------------------------|-------------------------|-------------------------|
|                  |                        |                         | Age ≤ 60                | Age >60 - ≤ 70          | Age >70                 | Black                   | White                   |
| Pulmonary        | Shortness of breath    | 56.32<br>(52.5, 60.08)  | 45.58<br>(39.3, 52.12)  | 65.22<br>(57.23, 73.39) | 57.18<br>(51.57, 62.79) | 53.82<br>(47.43, 60.33) | 58.11<br>(53.15, 63.04) |
| Mental health    | Sleep disorder         | 47.37<br>(42.35, 52.31) | 54.14<br>(42, 66.64)    | 48.22<br>(37.95, 58.8)  | 47.3<br>(40.65, 53.95)  | 32.66<br>(24.68, 40.82) | 56.77<br>(50.12, 63.38) |
| Endocrine        | Hyperlipidemia         | 16.72<br>(11.28, 22.12) | 18.22<br>(5.56, 31.23)  | 22.54<br>(10.45, 35.01) | 13.55<br>(6.69, 20.54)  | 14.83<br>(6.24, 23.63)  | 17.05<br>(9.93, 24.18)  |
| Cardiovascular   | Chest pain             | 29.6<br>(26.52, 32.66)  | 38.65<br>(31.96, 45.64) | 32.1<br>(25.6, 38.88)   | 23.59<br>(19.75, 27.5)  | 35.52<br>(29.58, 41.68) | 27.6<br>(23.87, 31.37)  |
| General          | Fatigue                | 43.64<br>(40.58, 46.66) | 14.05<br>(10.62, 17.82) | 35.91<br>(30.45, 41.61) | 66.68<br>(61.23, 72.1)  | 36.61<br>(31.68, 41.66) | 47.57<br>(43.55, 51.59) |
| Gastrointestinal | Gerd                   | 43<br>(38.45, 47.49)    | 21.06<br>(14, 28.58)    | 39.91<br>(31.23, 48.92) | 55.57<br>(48.59, 62.55) | 30.46<br>(23.7, 37.41)  | 51.35<br>(45.12, 57.57) |
| Coagulation      | Thromboembolism        | 28.18<br>(25.68, 30.69) | 21.91<br>(17.94, 26.28) | 31.28<br>(26.21, 36.71) | 30.09<br>(26.37, 33.93) | 30.44<br>(26.03, 35.09) | 27.44<br>(24.31, 30.64) |
| Pulmonary        | Cough                  | 15.73<br>(13.52, 17.98) | 13.38<br>(9.38, 17.87)  | 18.3<br>(13.79, 23.26)  | 14.74<br>(11.78, 17.86) | 14.97<br>(11.27, 19.01) | 15.94<br>(13.14, 18.84) |
| Musculoskeletal  | Muscle weakness        | 31.2<br>(28.78, 33.61)  | 8.81<br>(6.46, 11.49)   | 29.35<br>(24.65, 34.3)  | 49.93<br>(45.36, 54.5)  | 29.43<br>(25.21, 33.81) | 31.98<br>(28.92, 35.06) |
| Musculoskeletal  | Joint pain             | 35.78<br>(31.49, 40)    | 33.61<br>(25.57, 42.02) | 34.5<br>(25.89, 43.43)  | 36.98<br>(31.01, 43)    | 29.11<br>(21.82, 36.57) | 39.16<br>(33.69, 44.65) |
| Mental health    | Anxiety                | 28.15<br>(25.33, 30.95) | 21.1<br>(15.65, 27)     | 28.24<br>(22.44, 34.37) | 30.97<br>(27.14, 34.9)  | 25.17<br>(20.35, 30.26) | 30.24<br>(26.65, 33.86) |
| Endocrine        | Diabetes mellitus      | 26.9<br>(23.02, 30.85)  | 21.39<br>(15.93, 27.38) | 33.47<br>(25.06, 42.57) | 25.74<br>(19.86, 31.95) | 28.99<br>(21.81, 36.6)  | 26.3<br>(21.55, 31.27)  |
| Cardiovascular   | Arrhythmias            | 12.92<br>(10.79, 15.08) | 13.16<br>(9.4, 17.34)   | 11.79<br>(7.82, 16.18)  | 12.9<br>(9.84, 16.1)    | 12.18<br>(8.71, 15.94)  | 12.84<br>(10.14, 15.64) |
| Mental health    | Depression             | 29.33<br>(26.26, 32.37) | 33.45<br>(26.23, 41.06) | 33.09<br>(26.67, 39.81) | 27.05<br>(23.14, 31.06) | 28.03<br>(22.52, 33.75) | 30.29<br>(26.47, 34.15) |
| Kidney           | Chronic kidney disease | 36.41<br>(31.71, 41.11) | 4.73<br>(2.42, 7.39)    | 31.97<br>(23.86, 40.66) | 76.89<br>(65.12, 88.79) | 26.93<br>(21.31, 32.81) | 41.43<br>(34.49, 48.52) |
| Gastrointestinal | Constipation           | 23.96<br>(21.47, 26.43) | 9.89<br>(6.74, 13.38)   | 23.62<br>(18.81, 28.69) | 32<br>(27.95, 36.12)    | 24.85<br>(20.26, 29.66) | 24.22<br>(21.13, 27.34) |
| Neurologic       | Memory problems        | 22.62<br>(20.3, 24.93)  | 6.36<br>(4.16, 8.95)    | 16.83<br>(13.03, 20.97) | 42.01<br>(37.04, 47.05) | 17.74<br>(14.46, 21.24) | 24.89<br>(21.76, 28.07) |
| Pulmonary        | Hypoxemia              | 18.17                   | 11.15                   | 17.26                   | 24.81                   | 15.8                    | 19.84                   |

|                  |                        |                         |                         |                         |                         |                         |                         |
|------------------|------------------------|-------------------------|-------------------------|-------------------------|-------------------------|-------------------------|-------------------------|
|                  |                        | (16.49, 19.87)          | (8.72, 14.01)           | (14.09, 20.75)          | (21.9, 27.82)           | (13.01, 18.87)          | (17.6, 22.14)           |
| Cardiovascular   | Acute coronary disease | 26.19<br>(23.31, 29.07) | 8.12<br>(5.6, 10.99)    | 31.25<br>(25.03, 37.81) | 45.65<br>(39.21, 52.17) | 20.89<br>(16.84, 25.18) | 29.07<br>(24.99, 33.21) |
| Kidney           | Acute kidney injury    | 28.11<br>(25.94, 30.26) | 8.85<br>(6.73, 11.23)   | 26.55<br>(22.34, 31.00) | 42.92<br>(38.95, 46.90) | 34.41<br>(29.96, 38.99) | 26.83<br>(24.22, 29.47) |
| Cardiovascular   | Tachycardia            | 13.72<br>(12.05, 15.44) | 14.4<br>(11.21, 18)     | 13.47<br>(10.32, 16.98) | 12.83<br>(10.57, 15.24) | 16.28<br>(13.04, 19.81) | 12.84<br>(10.84, 14.97) |
| Gastrointestinal | Diarrhea               | 12.94<br>(11.08, 14.83) | 12.37<br>(8.8, 16.36)   | 13.73<br>(10.18, 17.62) | 12.29<br>(9.78, 14.92)  | 9.84<br>(7.07, 12.88)   | 14.16<br>(11.71, 16.7)  |
| Mental health    | Mood disorder          | 13.23<br>(10.97, 15.53) | 17.97<br>(11.65, 24.87) | 13.02<br>(8.86, 17.59)  | 12.1<br>(9.24, 15.1)    | 11.31<br>(7.11, 15.82)  | 13.63<br>(10.88, 16.49) |
| Neurologic       | Headache               | 7.47<br>(5.85, 9.14)    | 16.05<br>(10.76, 21.82) | 8.17<br>(4.67, 12.11)   | 5.28<br>(3.35, 7.4)     | 7.53<br>(4.43, 10.94)   | 7.67<br>(5.71, 9.76)    |
| Endocrine        | Obesity                | 9.19<br>(7.67, 10.71)   | 15.41<br>(10.91, 20.18) | 13.84<br>(10.06, 17.86) | 6.41<br>(4.67, 8.24)    | 10.52<br>(7.74, 13.44)  | 8.91<br>(7.01, 10.87)   |
| Dermatologic     | Skin rash              | 6.8<br>(5.01, 8.65)     | 8.82<br>(5.31, 12.81)   | 7.54<br>(4.07, 11.46)   | 5.25<br>(2.88, 7.81)    | 5.07<br>(2.36, 8.13)    | 7.95<br>(5.58, 10.46)   |
| Mental health    | Substance abuse        | 16.04<br>(13.42, 18.7)  | 18.06<br>(11.78, 24.94) | 26.57<br>(20.1, 33.45)  | 10.84<br>(7.94, 13.9)   | 20.12<br>(15.01, 25.5)  | 14.44<br>(11.31, 17.72) |
| Neurologic       | Stroke                 | 7.37<br>(6.02, 8.77)    | 4.3<br>(2.8, 6.14)      | 8.11<br>(5.4, 11.21)    | 9.32<br>(6.92, 11.87)   | 7.45<br>(5.11, 10.07)   | 7.61<br>(5.91, 9.41)    |
| Cardiovascular   | Bradycardia            | 6.71<br>(5.36, 8.1)     | 2.86<br>(1.32, 4.9)     | 5.83<br>(3.4, 8.72)     | 10.05<br>(7.65, 12.62)  | 3.85<br>(2.03, 5.98)    | 8.3<br>(6.45, 10.28)    |
| Cardiovascular   | Heart failure          | 8.17<br>(7.11, 9.26)    | 1.35<br>(0.73, 2.18)    | 7.57<br>(5.5, 9.92)     | 14.64<br>(12.42, 16.95) | 8.05<br>(6.16, 10.11)   | 8.54<br>(7.2, 9.94)     |
| Neurologic       | Smell problems         | 1.5<br>(0.98, 2.16)     | 2.76<br>(1.49, 4.65)    | 0.86<br>(0.19, 2.11)    | 1.16<br>(0.55, 2.05)    | 1.02<br>(0.31, 2.17)    | 1.84<br>(1.14, 2.76)    |
| Cardiovascular   | Myocarditis            | 1<br>(0.61, 1.6)        | 0.48<br>(0.15, 1.3)     | 0.84<br>(0.32, 2.05)    | 0.84<br>(0.41, 1.66)    | 0.73<br>(0.29, 1.74)    | 0.97<br>(0.52, 1.74)    |
| Dermatologic     | Hair loss              | 0.43<br>(0.23, 0.7)     | 2.03<br>(1.04, 3.43)    | 0.14<br>(-0.11, 0.77)   | 0.05<br>(0, 0.18)       | 0.41<br>(0.07, 0.97)    | 0.48<br>(0.22, 0.87)    |

| Organ (Level 1) | Sequelae (Level 2)  | Overall                 | Sex                     |                         | Comorbidity             |                         |                         |
|-----------------|---------------------|-------------------------|-------------------------|-------------------------|-------------------------|-------------------------|-------------------------|
|                 |                     |                         | Male                    | Female                  | No comorbidities        | 1-3 comorbidities       | >3 comorbidities        |
| Pulmonary       | Shortness of breath | 56.32<br>(52.5, 60.08)  | 54.88<br>(50.97, 58.74) | 75.8<br>(60.15, 93.15)  | 47.64<br>(41.39, 54.18) | 64.55<br>(58.46, 70.66) | 71.44<br>(61.79, 81.21) |
| Mental health   | Sleep disorder      | 47.37<br>(42.35, 52.31) | 48.79<br>(43.6, 53.9)   | 28.29<br>(10.18, 49.33) | 44.1<br>(35.65, 52.9)   | 46.44<br>(39.15, 53.76) | 53.57<br>(42.7, 64.68)  |
| Endocrine       | Hyperlipidemia      | 16.72<br>(11.28, 22.12) | 15.82<br>(10.24, 21.37) | 30.72<br>(8.59, 55.41)  | 19.91<br>(10.09, 30.02) | 19.49<br>(11.2, 27.92)  | 10.26<br>(0.47, 20.29)  |

|                  |                        |                         |                         |                         |                         |                         |                         |
|------------------|------------------------|-------------------------|-------------------------|-------------------------|-------------------------|-------------------------|-------------------------|
| Cardiovascular   | Chest pain             | 29.6<br>(26.52, 32.66)  | 28.56<br>(25.42, 31.67) | 46.01<br>(32.16, 61.87) | 28.49<br>(23.31, 34.01) | 33.06<br>(28.4, 37.8)   | 27.06<br>(20.45, 33.97) |
| General          | Fatigue                | 43.64<br>(40.58, 46.66) | 44.63<br>(41.44, 47.78) | 25.84<br>(16.75, 36.7)  | 27.75<br>(23.24, 32.57) | 47.46<br>(42.63, 52.34) | 84.53<br>(74.98, 94.11) |
| Gastrointestinal | GERD                   | 43<br>(38.45, 47.49)    | 44.4<br>(39.67, 49.07)  | 23.14<br>(8.33, 40.75)  | 30.76<br>(23.56, 38.4)  | 41.8<br>(35.21, 48.47)  | 56.43<br>(46.41, 66.69) |
| Coagulation      | Thromboembolism        | 28.18<br>(25.68, 30.69) | 28.37<br>(25.77, 30.99) | 25.68<br>(17.88, 35.44) | 31.08<br>(26.16, 36.43) | 32.44<br>(28.39, 36.64) | 30.84<br>(25.43, 36.56) |
| Pulmonary        | Cough                  | 15.73<br>(13.52, 17.98) | 15.33<br>(13.07, 17.64) | 21.61<br>(12.43, 33.13) | 15.99<br>(12.14, 20.34) | 16.66<br>(13.38, 20.13) | 14.54<br>(10.02, 19.46) |
| Musculoskeletal  | Muscle weakness        | 31.2<br>(28.78, 33.61)  | 32.32<br>(29.76, 34.84) | 15.12<br>(9.06, 22.74)  | 20.55<br>(17, 24.45)    | 34.85<br>(30.88, 38.9)  | 64.82<br>(56.78, 72.95) |
| Musculoskeletal  | Joint pain             | 35.78<br>(31.49, 40)    | 35.83<br>(31.41, 40.19) | 35.36<br>(19.29, 53.97) | 33.78<br>(26.74, 41.2)  | 32.95<br>(26.89, 39.1)  | 45.29<br>(35.03, 55.71) |
| Mental health    | Anxiety                | 28.15<br>(25.33, 30.95) | 27.99<br>(25.1, 30.86)  | 30.73<br>(18.58, 45.29) | 26.22<br>(21.39, 31.42) | 27.22<br>(23.15, 31.41) | 35.75<br>(29.24, 42.5)  |
| Endocrine        | Diabetes mellitus      | 26.9<br>(23.02, 30.85)  | 27.9<br>(23.78, 32.1)   | 17.17<br>(7.81, 29.52)  | 34.65<br>(28.56, 41.09) | 20.72<br>(15.22, 26.57) | 20.14<br>(10.05, 31.82) |
| Cardiovascular   | Arrhythmias            | 12.92<br>(10.79, 15.08) | 12.61<br>(10.43, 14.82) | 16.77<br>(8.32, 27.47)  | 11.34<br>(7.92, 15.26)  | 12.8<br>(9.68, 16.09)   | 16.03<br>(11.13, 21.28) |
| Mental health    | Depression             | 29.33<br>(26.26, 32.37) | 29.08<br>(25.95, 32.19) | 34.37<br>(20.28, 50.94) | 27.05<br>(21.75, 32.75) | 27.2<br>(22.89, 31.61)  | 36.83<br>(30.1, 43.83)  |
| Kidney           | Chronic kidney disease | 36.41<br>(31.71, 41.11) | 39.33<br>(34.29, 44.37) | 2.23<br>(-5.06, 13.55)  | 21.72<br>(16.21, 27.88) | 45.66<br>(37.54, 53.98) | 65.25<br>(49.21, 81.95) |
| Gastrointestinal | Constipation           | 23.96<br>(21.47, 26.43) | 24.19<br>(21.64, 26.75) | 18.58<br>(9.26, 29.96)  | 17.2<br>(13.53, 21.22)  | 25.63<br>(21.84, 29.53) | 37.1<br>(30.28, 44.13)  |
| Neurologic       | Memory problems        | 22.62<br>(20.3, 24.93)  | 23.56<br>(21.1, 26.01)  | 10.99<br>(5.68, 18.12)  | 22.43<br>(18.52, 26.66) | 24.57<br>(20.96, 28.3)  | 27.76<br>(21.98, 33.88) |
| Pulmonary        | Hypoxemia              | 18.17<br>(16.49, 19.87) | 18.86<br>(17.07, 20.67) | 10.02<br>(6.38, 14.98)  | 14.11<br>(11.26, 17.41) | 23.28<br>(20.31, 26.4)  | 30.19<br>(25.36, 35.33) |
| Cardiovascular   | Acute coronary disease | 26.19<br>(23.31, 29.07) | 29.21<br>(25.98, 32.42) | 3.74<br>(0.52, 8.51)    | 15.4<br>(11.89, 19.3)   | 32.5<br>(27.65, 37.47)  | 42.77<br>(33.51, 52.36) |
| Kidney           | Acute kidney injury    | 28.11<br>(25.94, 30.26) | 30.22<br>(27.88, 32.56) | 6.03<br>(2.94, 10.27)   | 19.97<br>(16.58, 23.71) | 34.44<br>(30.61, 38.36) | 69.87<br>(61.21, 78.66) |
| Cardiovascular   | Tachycardia            | 13.72<br>(12.05, 15.44) | 13.42<br>(11.71, 15.17) | 17.01<br>(10.36, 25.68) | 13.76<br>(10.83, 17.11) | 12.61<br>(10.21, 15.22) | 19.69<br>(15.54, 24.16) |
| Gastrointestinal | Diarrhea               | 12.94<br>(11.08, 14.83) | 12.79<br>(10.89, 14.73) | 14.47<br>(7.27, 23.65)  | 9.41<br>(6.7, 12.55)    | 12.89<br>(10.18, 15.78) | 19.74<br>(14.84, 24.96) |
| Mental           | Mood                   | 13.23                   | 13.61                   | 8.15                    | 13.63                   | 13.94                   | 11.06                   |



|                    |                    |                        |                         |                         |                        |                       |                         |
|--------------------|--------------------|------------------------|-------------------------|-------------------------|------------------------|-----------------------|-------------------------|
| health             | disorder           | (10.97, 15.53)         | (11.29, 15.98)          | (-1.05, 20.16)          | (9.46, 18.24)          | (10.67, 17.38)        | (6.93, 15.57)           |
| Neurologic         | Headache           | 7.47<br>(5.85, 9.14)   | 6.59<br>(4.98, 8.26)    | 28.62<br>(15.98, 43.62) | 7.06<br>(4.21, 10.31)  | 7.61<br>(5.32, 10.08) | 7.05<br>(3.86, 10.64)   |
| Endocrine          | Obesity            | 9.19<br>(7.67, 10.71)  | 9.44<br>(7.89, 11.01)   | 6.03<br>(-0.88, 14.4)   | 11.85<br>(9.05, 14.89) | 8.09<br>(5.91, 10.37) | 9.5<br>(6.13, 13.06)    |
| Dermatologi<br>c   | Skin rash          | 6.8<br>(5.01, 8.65)    | 6.53<br>(4.71, 8.42)    | 10.67<br>(3.22, 20.44)  | 8.57<br>(5.37, 12.31)  | 7.87<br>(5.23, 10.73) | 3.64<br>(0.24, 7.42)    |
| Mental<br>health   | Substance<br>abuse | 16.04<br>(13.42, 18.7) | 16.19<br>(13.46, 18.96) | 13.07<br>(5.03, 23.49)  | 29.45<br>(23.5, 35.82) | 11.88<br>(8.4, 15.56) | 11.98<br>(7.29, 17.01)  |
| Neurologic         | Stroke             | 7.37<br>(6.02, 8.77)   | 7.8<br>(6.36, 9.3)      | 2.5<br>(0.22, 6.34)     | 6.88<br>(4.78, 9.44)   | 8.65<br>(6.47, 11.04) | 10.02<br>(6.31, 14.11)  |
| Cardiovasc<br>ular | Bradycardia        | 6.71<br>(5.36, 8.1)    | 6.93<br>(5.51, 8.41)    | 3.83<br>(0.86, 8.8)     | 5.62<br>(3.49, 8.31)   | 8.21<br>(6.12, 10.5)  | 7.29<br>(4.07, 10.88)   |
| Cardiovasc<br>ular | Heart failure      | 8.17<br>(7.11, 9.26)   | 8.86<br>(7.7, 10.06)    | 1.49<br>(0.37, 3.41)    | 4.48<br>(3.08, 6.27)   | 11.11<br>(9.08, 13.3) | 22.76<br>(18.13, 27.65) |
| Neurologic         | Smell<br>problems  | 1.5<br>(0.98, 2.16)    | 1.3<br>(0.79, 1.96)     | 3.24<br>(1.32, 6.83)    | 1.77<br>(0.85, 3.28)   | 1.38<br>(0.7, 2.37)   | 1.29<br>(0.43, 2.67)    |
| Cardiovasc<br>ular | Myocarditis        | 1<br>(0.61, 1.6)       | 1.02<br>(0.61, 1.66)    | 0.01<br>(0, 0.07)       | 0.53<br>(0.21, 1.27)   | 0.49<br>(0.21, 1.07)  | 1.12<br>(0.48, 2.44)    |
| Dermatologi<br>c   | Hair loss          | 0.43<br>(0.23, 0.7)    | 0.21<br>(0.05, 0.48)    | 8.48<br>(4, 15.12)      | 0.58<br>(0.18, 1.27)   | 0.56<br>(0.26, 1.01)  | 0<br>(-0.09, 0.35)      |

Post-acute sequelae were ascertained from 30 days after infection until end of follow-up.  
Estimates of burdens per 1000 COVID-19 patients at 6-months are presented.

Supplementary Table 9: Burden of Post-acute Sequelae of COVID-19 individual sequelae in the overall cohort and by age, race, sex, and health status in COVID-19 admitted to intensive care

| Organ            | Sequelae               | Overall                  | Age                       |                          |                            | Race                     |                           |
|------------------|------------------------|--------------------------|---------------------------|--------------------------|----------------------------|--------------------------|---------------------------|
|                  |                        |                          | Age ≤ 60                  | Age >60 - ≤ 70           | Age >70                    | Black                    | White                     |
| Pulmonary        | Shortness of breath    | 99.81<br>(91.64, 108.18) | 81.13<br>(67.03, 96.99)   | 98.42<br>(82.56, 115.75) | 110.56<br>(98.49, 123.17)  | 96.67<br>(83.27, 111.23) | 100.27<br>(89.91, 111.13) |
| Mental health    | Sleep disorder         | 77.55<br>(67.33, 88.16)  | 109.41<br>(82.65, 138.81) | 63.42<br>(44.52, 84.69)  | 76.07<br>(62.86, 90.28)    | 58.12<br>(42.47, 75.5)   | 91.81<br>(77.97, 106.39)  |
| Endocrine        | Hyperlipidemia         | 41.8<br>(31.14, 52.79)   | 55.66<br>(29.85, 83.98)   | 44.59<br>(22.66, 68.72)  | 36.1<br>(22.75, 50.5)      | 30<br>(14.13, 47.59)     | 48.58<br>(34.23, 63.65)   |
| Cardiovascular   | Chest pain             | 31.99<br>(26.64, 37.73)  | 47.99<br>(35.58, 62.53)   | 32.3<br>(21.72, 44.74)   | 24.39<br>(17.92, 31.71)    | 38.35<br>(28.47, 49.6)   | 29.45<br>(22.94, 36.67)   |
| General          | Fatigue                | 83.47<br>(76.6, 90.56)   | 44.41<br>(34.81, 55.59)   | 84.61<br>(71.43, 99.11)  | 109.34<br>(98.07, 121.23)  | 82.57<br>(71.24, 94.92)  | 81.42<br>(72.71, 90.58)   |
| Gastrointestinal | GERD                   | 67.61<br>(58.65, 76.96)  | 31.82<br>(18.35, 47.74)   | 66.46<br>(49.81, 85.16)  | 86.64<br>(72.85, 101.39)   | 56.84<br>(43.36, 71.94)  | 72.65<br>(60.65, 85.39)   |
| Coagulation      | Thromboembolism        | 64.14<br>(58.19, 70.5)   | 48.68<br>(39.08, 60.2)    | 66.47<br>(54.97, 79.73)  | 71.28<br>(62.37, 81.08)    | 60.83<br>(51.4, 71.59)   | 66.34<br>(58.46, 74.89)   |
| Pulmonary        | Cough                  | 22.71<br>(18.47, 27.42)  | 31.7<br>(22.13, 43.66)    | 19.96<br>(12.42, 29.55)  | 19.9<br>(14.47, 26.28)     | 32.24<br>(24.12, 41.85)  | 16.1<br>(11.37, 21.63)    |
| Musculoskeletal  | Muscle weakness        | 60.24<br>(54.79, 65.96)  | 27.07<br>(20.58, 34.96)   | 55.09<br>(44.93, 66.63)  | 90.08<br>(80.18, 100.62)   | 57.19<br>(48.13, 67.32)  | 61.5<br>(54.46, 68.99)    |
| Musculoskeletal  | Joint pain             | 55.47<br>(47.24, 64.07)  | 41.05<br>(26.37, 58.04)   | 43.99<br>(29.19, 60.78)  | 69.43<br>(57.13, 82.64)    | 53.04<br>(39.21, 68.41)  | 57.03<br>(46.5, 68.26)    |
| Mental health    | Anxiety                | 76.72<br>(69.6, 84.11)   | 60.04<br>(46.04, 76.3)    | 83.38<br>(68.84, 99.52)  | 81.06<br>(71.47, 91.34)    | 73.86<br>(61.78, 87.18)  | 76.61<br>(67.69, 86.1)    |
| Endocrine        | Diabetes mellitus      | 51.03<br>(42.71, 60.02)  | 45.04<br>(32.16, 60.65)   | 48.61<br>(32.51, 68.14)  | 55.58<br>(42.95, 69.87)    | 57.54<br>(42.17, 75.49)  | 45.21<br>(35.44, 56.17)   |
| Cardiovascular   | Arrhythmias            | 31.59<br>(26.69, 36.91)  | 27.47<br>(18.84, 38.28)   | 33.88<br>(24.65, 44.91)  | 31.74<br>(24.82, 39.61)    | 26.1<br>(18.68, 34.85)   | 33.23<br>(26.83, 40.38)   |
| Mental health    | Depression             | 37.56<br>(31.87, 43.66)  | 31.85<br>(19.24, 47.04)   | 41.95<br>(30.82, 54.91)  | 38.83<br>(31.3, 47.23)     | 27.1<br>(18.22, 37.5)    | 43.14<br>(35.61, 51.37)   |
| Kidney           | Chronic kidney disease | 82.55<br>(71.93, 93.78)  | 13.37<br>(8.31, 19.86)    | 66.37<br>(49.47, 86.02)  | 169.58<br>(143.83, 196.91) | 71.35<br>(57.93, 86.27)  | 83.77<br>(68.5, 100.4)    |
| Gastrointestinal | Constipation           | 42.46<br>(37.21, 48.02)  | 27.59<br>(19.8, 37.1)     | 33.18<br>(24.15, 43.79)  | 56.92<br>(48.27, 66.22)    | 32.56<br>(24.27, 42.01)  | 49.64<br>(42.55, 57.29)   |
| Neurologic       | Memory problems        | 37.89<br>(33.13, 42.96)  | 17.68<br>(11.89, 25.27)   | 33.05<br>(24.77, 42.96)  | 63.39<br>(53.74, 73.86)    | 32.41<br>(25.62, 40.26)  | 40.99<br>(34.55, 48.06)   |
| Pulmonary        | Hypoxemia              | 37.73                    | 23.39                     | 41.22                    | 48                         | 29.48                    | 42.24                     |

|                  |                        |                         |                         |                         |                           |                          |                         |
|------------------|------------------------|-------------------------|-------------------------|-------------------------|---------------------------|--------------------------|-------------------------|
|                  |                        | (33.88, 41.91)          | (17.73, 30.54)          | (33.58, 50.29)          | (41.57, 55.13)            | (23.76, 36.46)           | (37.01, 48.01)          |
| Cardiovascular   | Acute coronary disease | 50.33<br>(44.21, 56.8)  | 14.64<br>(9.59, 21.16)  | 51.24<br>(39.49, 64.74) | 92.07<br>(78.3, 106.86)   | 43.69<br>(34.84, 53.69)  | 53.72<br>(45.23, 62.88) |
| Kidney           | Acute kidney injury    | 73.18<br>(67.53, 79.02) | 31.32<br>(25.16, 38.54) | 75.08<br>(63.98, 87.38) | 100.86<br>(91.03, 111.23) | 92.16<br>(80.93, 104.43) | 68.09<br>(61.16, 75.4)  |
| Cardiovascular   | Tachycardia            | 32.08<br>(28.01, 36.5)  | 34.76<br>(26.45, 44.87) | 38.41<br>(30.23, 48.09) | 26.55<br>(21.46, 32.39)   | 39.05<br>(31.51, 47.89)  | 28.69<br>(23.8, 34.19)  |
| Gastrointestinal | Diarrhea               | 23.73<br>(19.86, 27.96) | 17.37<br>(10.6, 26.13)  | 24.63<br>(17.55, 33.21) | 25.72<br>(20.23, 31.97)   | 18.85<br>(13.29, 25.57)  | 25.9<br>(20.76, 31.7)   |
| Mental health    | Mood disorder          | 19.05<br>(14.73, 23.79) | 19.73<br>(8.36, 33.93)  | 19.38<br>(11.61, 29.1)  | 18.89<br>(13.47, 25.22)   | 17.72<br>(9.91, 27.18)   | 19.35<br>(14.05, 25.39) |
| Neurologic       | Headache               | 10.95<br>(7.87, 14.42)  | 20.63<br>(10.59, 33.19) | 13.58<br>(7.09, 21.95)  | 8.49<br>(4.89, 13.01)     | 12.06<br>(6.39, 19.11)   | 10.92<br>(7.12, 15.44)  |
| Endocrine        | Obesity                | 19.59<br>(16.4, 22.98)  | 31.34<br>(21.44, 42.84) | 20.71<br>(14.02, 28.54) | 17.33<br>(13.55, 21.58)   | 15.91<br>(10.68, 21.99)  | 21.48<br>(17.34, 25.99) |
| Dermatologic     | Skin rash              | 8.98<br>(5.75, 12.66)   | 11.3<br>(4.87, 20.06)   | 7.27<br>(1.71, 14.74)   | 8.8<br>(4.43, 14.14)      | 4.38<br>(0.12, 10.15)    | 10.97<br>(6.61, 16.1)   |
| Mental health    | Substance abuse        | 25.19<br>(20.16, 30.62) | 30.92<br>(18.51, 45.95) | 32.01<br>(21.11, 44.78) | 20.33<br>(14.49, 27.05)   | 29.84<br>(20.54, 40.66)  | 22.03<br>(16.01, 28.79) |
| Neurologic       | Stroke                 | 16.78<br>(13.69, 20.23) | 6.1<br>(3.42, 9.98)     | 16.85<br>(10.99, 24.4)  | 24.33<br>(18.67, 30.86)   | 24.31<br>(18.29, 31.48)  | 13.81<br>(10.19, 18.1)  |
| Cardiovascular   | Bradycardia            | 16.46<br>(13.35, 19.94) | 8.27<br>(4.39, 14.17)   | 12.94<br>(7.82, 19.81)  | 25.19<br>(19.56, 31.67)   | 11.86<br>(7.65, 17.23)   | 19.3<br>(15, 24.29)     |
| Cardiovascular   | Heart failure          | 16.83<br>(14.45, 19.43) | 6.15<br>(4.12, 8.92)    | 15.09<br>(10.72, 20.52) | 27.52<br>(22.71, 32.9)    | 16.23<br>(12.28, 20.96)  | 17.18<br>(14.13, 20.61) |
| Neurologic       | Smell problems         | 3.13<br>(1.95, 4.83)    | 3.57<br>(1.3, 8.33)     | 4<br>(1.82, 8.07)       | 2.25<br>(0.99, 4.51)      | 1.92<br>(0.54, 4.83)     | 3.45<br>(1.94, 5.83)    |
| Cardiovascular   | Myocarditis            | 2.13<br>(1.22, 3.66)    | 1.76<br>(0.62, 4.74)    | 2.32<br>(0.92, 5.69)    | 0.96<br>(0.35, 2.54)      | 1.62<br>(0.6, 4.19)      | 1.86<br>(0.88, 3.85)    |
| Dermatologic     | Hair loss              | 0.44<br>(0.11, 1.05)    | 1.14<br>(-0.08, 4.39)   | 0.61<br>(0.01, 2.49)    | 0.1<br>(0, 0.49)          | 0.48<br>(-0.05, 1.89)    | 0.4<br>(0.04, 1.37)     |

| Organ         | Sequelae            | Overall                  | Sex                      |                        | Comorbidity              |                          |                           |
|---------------|---------------------|--------------------------|--------------------------|------------------------|--------------------------|--------------------------|---------------------------|
|               |                     |                          | Male                     | Female                 | No comorbidities         | 1-3 comorbidities        | >3 comorbidities          |
| Pulmonary     | Shortness of breath | 99.81<br>(91.64, 108.18) | 100.2<br>(91.75, 108.88) | 88.3<br>(61.05, 122.7) | 90.99<br>(76.22, 107.56) | 112.35<br>(99.5, 125.95) | 129.5<br>(109.95, 150.31) |
| Mental health | Sleep disorder      | 77.55<br>(67.33, 88.16)  | 78.39<br>(67.87, 89.34)  | 65.1<br>(27.8, 113.78) | 99.67<br>(78.58, 122.94) | 66.93<br>(52.96, 82.06)  | 82.73<br>(62.29, 105.39)  |

|                  |                        |                         |                         |                          |                         |                           |                            |
|------------------|------------------------|-------------------------|-------------------------|--------------------------|-------------------------|---------------------------|----------------------------|
| Endocrine        | Hyperlipidemia         | 41.8<br>(31.14, 52.79)  | 42.37<br>(31.43, 53.69) | 29.43<br>(-9.62, 80.99)  | 69.21<br>(46.64, 93.88) | 43.71<br>(27.83, 60.72)   | 20.97<br>(3.96, 40.03)     |
| Cardiovascular   | Chest pain             | 31.99<br>(26.64, 37.73) | 31.89<br>(26.4, 37.79)  | 33.42<br>(13.39, 62.42)  | 29.47<br>(20.05, 41.03) | 41.14<br>(32.7, 50.55)    | 25.11<br>(14.57, 37.44)    |
| General          | Fatigue                | 83.47<br>(76.6, 90.56)  | 86.42<br>(79.22, 93.88) | 42.2<br>(25.07, 65.71)   | 61.61<br>(49.96, 75.1)  | 105.01<br>(93.27, 117.44) | 129.56<br>(111.33, 149.06) |
| Gastrointestinal | GERD                   | 67.61<br>(58.65, 76.96) | 68.59<br>(59.32, 78.28) | 55.93<br>(25.2, 97.03)   | 37.16<br>(23.48, 53.23) | 71.6<br>(58.39, 85.9)     | 90.2<br>(71.33, 110.89)    |
| Coagulation      | Thromboembolism        | 64.14<br>(58.19, 70.5)  | 67.41<br>(61.1, 74.15)  | 20.81<br>(10.03, 38.99)  | 67.07<br>(54.6, 81.62)  | 78.55<br>(68.44, 89.7)    | 71.03<br>(58.97, 84.7)     |
| Pulmonary        | Cough                  | 22.71<br>(18.47, 27.42) | 21.59<br>(17.32, 26.37) | 42.89<br>(22.7, 72.91)   | 23.03<br>(15.2, 33.27)  | 24.13<br>(17.81, 31.58)   | 23.3<br>(14.91, 33.45)     |
| Musculoskeletal  | Muscle weakness        | 60.24<br>(54.79, 65.96) | 63.1<br>(57.32, 69.17)  | 24.99<br>(13.59, 41.74)  | 45.53<br>(36.18, 56.55) | 77.24<br>(67.49, 87.77)   | 105.87<br>(90.07, 123.02)  |
| Musculoskeletal  | Joint pain             | 55.47<br>(47.24, 64.07) | 57.12<br>(48.58, 66.05) | 31.51<br>(5.71, 67.73)   | 43.16<br>(29.69, 58.71) | 56.66<br>(44.76, 69.61)   | 73.57<br>(54.6, 94.51)     |
| Mental health    | Anxiety                | 76.72<br>(69.6, 84.11)  | 77.46<br>(70.12, 85.09) | 63.96<br>(37.21, 100.35) | 68.05<br>(54.62, 83.52) | 80.44<br>(69.74, 92)      | 98.12<br>(82.99, 114.62)   |
| Endocrine        | Diabetes mellitus      | 51.03<br>(42.71, 60.02) | 54.14<br>(45.25, 63.75) | 17.52<br>(2.28, 44.83)   | 61.8<br>(48.88, 76.33)  | 41.16<br>(29.46, 54.86)   | 45.21<br>(24.57, 72.31)    |
| Cardiovascular   | Arrhythmias            | 31.59<br>(26.69, 36.91) | 31.81<br>(26.77, 37.32) | 24.93<br>(8.9, 50.51)    | 27.9<br>(19.26, 38.86)  | 35.57<br>(27.99, 44.22)   | 34.87<br>(24.8, 46.58)     |
| Mental health    | Depression             | 37.56<br>(31.87, 43.66) | 36.76<br>(31.02, 42.92) | 50.22<br>(22.54, 89.04)  | 32.43<br>(22.03, 45.09) | 42.11<br>(33.6, 51.62)    | 40.73<br>(29.39, 53.69)    |
| Kidney           | Chronic kidney disease | 82.55<br>(71.93, 93.78) | 86.89<br>(75.57, 98.86) | 33.75<br>(12.87, 67.62)  | 49.25<br>(36.08, 65.16) | 107.91<br>(89.86, 127.46) | 131.26<br>(98.06, 168.59)  |
| Gastrointestinal | Constipation           | 42.46<br>(37.21, 48.02) | 43.43<br>(37.99, 49.19) | 28.77<br>(11.43, 54.27)  | 30.78<br>(22.33, 41.17) | 56.66<br>(47.77, 66.42)   | 51.13<br>(38.58, 65.13)    |
| Neurologic       | Memory problems        | 37.89<br>(33.13, 42.96) | 39.04<br>(34.01, 44.41) | 26.21<br>(14.17, 44.5)   | 35.68<br>(27.25, 45.89) | 45.36<br>(37.48, 54.2)    | 46.41<br>(35.39, 58.93)    |
| Pulmonary        | Hypoxemia              | 37.73<br>(33.88, 41.91) | 39.66<br>(35.55, 44.15) | 14.25<br>(7.96, 24.49)   | 36.03<br>(28.25, 45.7)  | 51.24<br>(44.09, 59.31)   | 54.54<br>(44.67, 65.93)    |
| Cardiovascular   | Acute coronary disease | 50.33<br>(44.21, 56.8)  | 56.32<br>(49.48, 63.57) | 4.79<br>(-0.24, 14.73)   | 37.36<br>(28.68, 47.63) | 64.27<br>(53.65, 75.88)   | 71.93<br>(54.64, 91.33)    |
| Kidney           | Acute kidney injury    | 73.18<br>(67.53, 79.02) | 78.82<br>(72.69, 85.16) | 14.09<br>(7.5, 24.18)    | 52.18<br>(42.27, 63.75) | 102.76<br>(92.06, 114.18) | 153.68<br>(134.48, 174.16) |
| Cardiovascular   | Tachycardia            | 32.08                   | 32.05                   | 31.06                    | 40.9                    | 39.7                      | 29.8                       |

|                  |                 |                         |                         |                         |                         |                         |                         |
|------------------|-----------------|-------------------------|-------------------------|-------------------------|-------------------------|-------------------------|-------------------------|
| ular             |                 | (28.01, 36.5)           | (27.86, 36.6)           | (17, 52.54)             | (31.52, 52.34)          | (32.86, 47.48)          | (22.1, 39)              |
| Gastrointestinal | Diarrhea        | 23.73<br>(19.86, 27.96) | 24.17<br>(20.15, 28.58) | 18.25<br>(6.22, 37.33)  | 16.01<br>(9.96, 24.22)  | 28.17<br>(21.98, 35.35) | 33.4<br>(24.11, 44.15)  |
| Mental health    | Mood disorder   | 19.05<br>(14.73, 23.79) | 18.52<br>(14.15, 23.35) | 30.42<br>(10.07, 60.75) | 16.13<br>(8.1, 26.45)   | 16.04<br>(10.26, 22.89) | 25.78<br>(17.4, 35.75)  |
| Neurologic       | Headache        | 10.95<br>(7.87, 14.42)  | 10.8<br>(7.68, 14.36)   | 21.69<br>(1.95, 51.93)  | 16.31<br>(9.47, 25.16)  | 10.88<br>(6.59, 16.14)  | 7.41<br>(2.42, 13.93)   |
| Endocrine        | Obesity         | 19.59<br>(16.4, 22.98)  | 19.51<br>(16.31, 22.94) | 19.24<br>(3.6, 42.16)   | 24.02<br>(17.48, 31.71) | 20.04<br>(15.31, 25.33) | 19.32<br>(13, 26.68)    |
| Dermatologic     | Skin rash       | 8.98<br>(5.75, 12.66)   | 8.06<br>(4.83, 11.78)   | 23.73<br>(8.36, 47.95)  | 7.84<br>(2.4, 15.72)    | 11.37<br>(6.47, 17.4)   | 7.28<br>(1.28, 14.95)   |
| Mental health    | Substance abuse | 25.19<br>(20.16, 30.62) | 25.63<br>(20.41, 31.28) | 17.72<br>(3.23, 41.7)   | 29.63<br>(18.87, 42.77) | 24.01<br>(16.99, 32.04) | 25.39<br>(16.48, 35.92) |
| Neurologic       | Stroke          | 16.78<br>(13.69, 20.23) | 18.15<br>(14.8, 21.88)  | 1.95<br>(-0.93, 9.65)   | 16.34<br>(10.94, 23.67) | 18.02<br>(13.12, 23.96) | 25.59<br>(17.5, 35.28)  |
| Cardiovascular   | Bradycardia     | 16.46<br>(13.35, 19.94) | 17.38<br>(14.06, 21.1)  | 5.06<br>(0.37, 16.39)   | 16.37<br>(10.61, 24.28) | 20.38<br>(15.32, 26.47) | 17.81<br>(11.12, 26.05) |
| Cardiovascular   | Heart failure   | 16.83<br>(14.45, 19.43) | 18.37<br>(15.75, 21.23) | 2.42<br>(0.48, 6.79)    | 11.38<br>(7.51, 16.81)  | 21.54<br>(17.02, 26.81) | 47.64<br>(37.77, 58.81) |
| Neurologic       | Smell problems  | 3.13<br>(1.95, 4.83)    | 3.21<br>(1.97, 5.01)    | 2.21<br>(0.1, 10.84)    | 3.76<br>(1.53, 8.37)    | 2.98<br>(1.43, 5.69)    | 2.84<br>(1.04, 6.3)     |
| Cardiovascular   | Myocarditis     | 2.13<br>(1.22, 3.66)    | 2.1<br>(1.18, 3.68)     | 0.03<br>(0, 0.28)       | 1.05<br>(0.31, 3.51)    | 1.6<br>(0.7, 3.47)      | 1.81<br>(0.65, 4.61)    |
| Dermatologic     | Hair loss       | 0.44<br>(0.11, 1.05)    | 0.16<br>(-0.04, 0.82)   | 9.82<br>(2.35, 26.26)   | 0.98<br>(0.17, 3.13)    | 0.39<br>(0.01, 1.41)    | 0.06<br>(-0.1, 1.21)    |

Post-acute sequelae were ascertained from 30 days after infection until end of follow-up.  
Estimates of burdens per 1000 COVID-19 patients at 6-months are presented.

Supplementary Table 10: Overall burden of Post-Acute Sequelae of SARS-CoV-2 infection (PASC) after 12 weeks per 1000 persons at 6 months in the overall cohort and across care setting (non-hospitalized, hospitalized, and admitted to intensive care during the acute phase of the infection).

|                                                                                                                                                                                                                                                                                                  | COVID-19 group<br>Adjusted burden per<br>1000 persons at 6<br>months (95% CI) | Users of the VHA<br>without COVID-19<br>Adjusted burden per<br>1000 persons at 6<br>months (95% CI) | Burden associated<br>with COVID-19 <sup>†</sup><br><br>Adjusted burden per<br>1000 persons at 6<br>months (95% CI) |
|--------------------------------------------------------------------------------------------------------------------------------------------------------------------------------------------------------------------------------------------------------------------------------------------------|-------------------------------------------------------------------------------|-----------------------------------------------------------------------------------------------------|--------------------------------------------------------------------------------------------------------------------|
| Overall                                                                                                                                                                                                                                                                                          | 145.76<br>(144.07, 147.36)                                                    | 86.36<br>(85.97, 86.77)                                                                             | 59.36<br>(57.72, 60.97)                                                                                            |
| Non-hospitalized<br>COVID-19*                                                                                                                                                                                                                                                                    | 126.96<br>(125.17, 128.67)                                                    | 86.36<br>(85.97, 86.77)                                                                             | 40.60<br>(38.83, 42.26)                                                                                            |
| Hospitalized COVID-<br>19*                                                                                                                                                                                                                                                                       | 244.63<br>(239.22, 250.68)                                                    | 86.36<br>(85.97, 86.77)                                                                             | 158.31<br>(152.92, 164.30)                                                                                         |
| COVID-19 required<br>ICU*                                                                                                                                                                                                                                                                        | 313.58<br>(301.92, 324.91)                                                    | 86.36<br>(85.97, 86.77)                                                                             | 227.18<br>(215.65, 238.46)                                                                                         |
| <p>*. Care settings during the first 30 days of infection.<br/>           †. Burden defined as having at least one sequela in excess of users of the Veterans Health Administration without COVID-19 after the first 84-days of infection. Burden was estimated based on Poisson regression.</p> |                                                                               |                                                                                                     |                                                                                                                    |

Supplementary Table 11: Risks and burdens of individual sequela after 12 weeks infection of COVID-19

| Organ            | Sequelae               | Hazard Ratio<br>(95% CI) | Burden per 1000 persons at 6 months<br>(95% CI) |
|------------------|------------------------|--------------------------|-------------------------------------------------|
| Cardiovascular   | Chest pain             | 1.43 (1.39, 1.46)        | 12.61 (11.53, 13.62)                            |
|                  | Arrhythmias            | 1.34 (1.29, 1.38)        | 6.33 (5.49, 7.12)                               |
|                  | Acute coronary disease | 1.17 (1.13, 1.21)        | 4.78 (3.84, 5.66)                               |
|                  | Tachycardia            | 1.26 (1.19, 1.33)        | 2.17 (1.67, 2.65)                               |
|                  | Bradycardia            | 1.2 (1.14, 1.27)         | 1.94 (1.37, 2.48)                               |
|                  | Heart failure          | 1.14 (1.07, 1.21)        | 1.13 (0.74, 1.52)                               |
|                  | Myocarditis            | 4.75 (3.22, 6.8)         | 0.22 (0.14, 0.32)                               |
| Coagulation      | Thromboembolism        | 1.68 (1.6, 1.76)         | 7.44 (6.71, 8.14)                               |
| Dermatologic     | Skin rash              | 1.18 (1.14, 1.22)        | 3.09 (2.38, 3.78)                               |
|                  | Hair loss              | 1.83 (1.63, 2.05)        | 0.27 (0.2, 0.34)                                |
| Endocrine        | Hyperlipidemia         | 1.07 (1.06, 1.09)        | 14.74 (11.35, 17.85)                            |
|                  | Diabetes mellitus      | 1.21 (1.17, 1.24)        | 6.98 (5.82, 8.07)                               |
|                  | Obesity                | 1.16 (1.13, 1.19)        | 3.01 (2.52, 3.48)                               |
| Gastrointestinal | GERD                   | 1.18 (1.16, 1.21)        | 10.44 (9.01, 11.77)                             |
|                  | Constipation           | 1.22 (1.18, 1.26)        | 5.16 (4.24, 6.01)                               |
|                  | Diarrhea               | 1.28 (1.23, 1.33)        | 4.13 (3.44, 4.79)                               |
| General          | Fatigue                | 1.29 (1.25, 1.33)        | 7.84 (6.86, 8.77)                               |
| Kidney           | Chronic kidney disease | 1.15 (1.11, 1.20)        | 5.76 (2.68, 8.68)                               |
|                  | Acute kidney injury    | 1.16 (1.11, 1.21)        | 3.02 (2.34, 3.67)                               |
| Mental health    | Sleep disorders        | 1.25 (1.23, 1.28)        | 17.86 (16.22, 19.39)                            |
|                  | Anxiety                | 1.12 (1.08, 1.15)        | 5.24 (3.81, 6.57)                               |
|                  | Depression             | 1.19 (1.15, 1.22)        | 5.58 (4.66, 6.46)                               |
|                  | Mood disorder          | 1.17 (1.14, 1.21)        | 3.79 (3.05, 4.49)                               |
|                  | Substance abuse        | 1.11 (1.06, 1.15)        | 1.27 (0.8, 1.82)                                |
| Musculoskeletal  | Muscle weakness        | 1.3 (1.25, 1.35)         | 5.32 (4.53, 6.06)                               |
|                  | Joint pain             | 1.11 (1.08, 1.13)        | 6.61 (5.18, 7.94)                               |
| Neurologic       | Memory problems        | 1.35 (1.3, 1.4)          | 5.92 (5.13, 6.67)                               |
|                  | Headache               | 1.27 (1.23, 1.31)        | 3.88 (3.31, 4.42)                               |
|                  | Stroke                 | 1.26 (1.19, 1.32)        | 2.36 (1.8, 2.9)                                 |
|                  | Smell problems         | 3.45 (3.11, 3.8)         | 1.74 (1.5, 1.98)                                |
| Pulmonary        | Shortness of breath    | 1.72 (1.68, 1.76)        | 24.13 (22.83, 25.34)                            |

|                                                                                                                                                                                                                                                                                                                                                                                                                                |           |                   |                   |
|--------------------------------------------------------------------------------------------------------------------------------------------------------------------------------------------------------------------------------------------------------------------------------------------------------------------------------------------------------------------------------------------------------------------------------|-----------|-------------------|-------------------|
|                                                                                                                                                                                                                                                                                                                                                                                                                                | Cough     | 1.47 (1.42, 1.52) | 7.5 (6.68, 8.27)  |
|                                                                                                                                                                                                                                                                                                                                                                                                                                | Hypoxemia | 1.77 (1.67, 1.88) | 4.08 (3.62, 4.53) |
| <p>Adjusted hazard ratio, adjusted burden per 1000 persons at 6 months of people with COVID-19 compared to users of the Veterans Health Administration. All users of the VHA served as the referent category. Outcomes were ascertained from week 12 after COVID-19 diagnosis until end of follow-up. For each outcome, cohort participants without history of the outcome in past one year were included in the analysis.</p> |           |                   |                   |



Supplementary Table 12: Results of negative outcome controls in people with COVID-19 (the overall COVID-19 cohort), and in non-hospitalized, hospitalized, and admitted to intensive care for COVID-19.

| Negative outcome control | COVID-19<br>Hazard Ratio<br>(95% CI) | Care setting*                                            |                                                   |                                                   |
|--------------------------|--------------------------------------|----------------------------------------------------------|---------------------------------------------------|---------------------------------------------------|
|                          |                                      | Non-hospitalized<br>COVID-19<br>Hazard Ratio<br>(95% CI) | Hospitalized COVID-19<br>Hazard Ratio<br>(95% CI) | COVID-19 required ICU<br>Hazard Ratio<br>(95% CI) |
| Accidental injuries †    | 1.04<br>(0.84, 1.29)                 | 1.03<br>(0.88, 1.22)                                     | 1.06<br>(0.68, 1.63)                              | 1.07<br>(0.56, 2.03)                              |
| Neoplasms †              | 1.01<br>(0.88, 1.17)                 | 1.04<br>(0.94, 1.06)                                     | 0.87<br>(0.79, 1.16)                              | 0.88<br>(0.76, 1.25)                              |

\*. Care setting during the first 30 days of infection.  
†. The users of the Veterans Health Administration without COVID-19 served as the referent category. Outcomes ascertained after the first 30-days of infection.

Supplementary Table 13: Definition of each Post-Acute Sequela of SARS-CoV-2 infection (PASC)

| Organ            | Sequelae               | Definition                                                                                                                                                |
|------------------|------------------------|-----------------------------------------------------------------------------------------------------------------------------------------------------------|
| Cardiovascular   | Acute coronary disease | ICD10 code: I21, I22, I24, I2510, I2511                                                                                                                   |
|                  | Arrythmias             | ICD10 code: I49, R002, R008, R009                                                                                                                         |
|                  | Bradycardia            | ICD10 code: R001                                                                                                                                          |
|                  | Chest pain             | ICD10 code: R071, R078, R079                                                                                                                              |
|                  | Heart failure          | ICD10 code: I5021, I5023, I5031, I5033, I5041, I5043, I50811, I50813                                                                                      |
|                  | Myocarditis            | ICD10 code: B3320, B3321, B3322, B3323, B3324, I400                                                                                                       |
|                  | Tachycardia            | ICD10 code: R000                                                                                                                                          |
| Coagulation      | Thromboembolism        | ICD10 code: I740-I745, I748, I749, I800-I803, I808-I819, I820-I829, I82A-I82C, I2601, I2602, I2609, I2690, I2692, I2693, I2694, I2699                     |
| Dermatologic     | Hair loss              | ICD10 code: L659, L658, L63                                                                                                                               |
|                  | Skin rash              | ICD10 code: R21, B09, L282                                                                                                                                |
| Endocrine        | Diabetes mellitus      | ICD10 code: E08, E09, E10, E11, E13 or HbA1c > 6.5% or use of antihyperglycemics                                                                          |
|                  | Hyperlipidemia         | Low-density lipoprotein cholesterol>130 mg/dL or Triglycerides>150 mg/dL and use of antilipemic agents                                                    |
|                  | Obesity                | ICD10 code: E668, E669, E661, E662 or BMI>30 kg/m <sup>2</sup>                                                                                            |
| Gastrointestinal | Constipation           | ICD10 code: K5900, K5901, K5902, K5903, K5904, K5909 or use of laxatives                                                                                  |
|                  | Diarrhea               | ICD10 code: R197                                                                                                                                          |
|                  | GERD                   | ICD10 code: K210, K2100, K2101, K219                                                                                                                      |
| General          | Fatigue                | ICD10 code: R531, R5381, R5382, R8383                                                                                                                     |
| Kidney           | Acute kidney injury    | Serum creatine measurement increases more than 50% or increases 0.3 mg/dL                                                                                 |
|                  | Chronic kidney disease | eGFR measurement < 60 mL/min/1.73m <sup>2</sup>                                                                                                           |
| Mental health    | Anxiety                | Use of benzodiazepine derivative sedatives or hypnotics                                                                                                   |
|                  | Depression             | ICD10 code: F320, F321, F322, F323, F324, F329                                                                                                            |
|                  | Mood disorder          | ICD10 code: F23, F24, F28, F4310, F0631, F0632, F063, F341                                                                                                |
|                  | Sleep disorder         | ICD10 code: F510, F511, F513-F515, F518, F519, G470-G476. G478, G479, R063                                                                                |
|                  | Substance abuse        | ICD10 code: F10-F19                                                                                                                                       |
| Musculoskeletal  | Joint pain             | ICD10 code: M25.5, M79.6, R52, G89, M00-M14                                                                                                               |
|                  | Muscle weakness        | ICD10 code: M6281                                                                                                                                         |
| Neurologic       | Headache               | ICD10 code: G439, G43C, G440, G442, R51                                                                                                                   |
|                  | Memory problems        | ICD10 code: R411-R413, F0150, F0151, F0280, F0281, F0390, F0391, F04, F05, F060, F068, G309, G3109, G311, G3183-G3185, G3189, G319, G910, G911, G937, G94 |
|                  | Smell problems         | ICD10 code: R430, R431, R432, R438, R439                                                                                                                  |
|                  | Stroke                 | ICD10 code: I514, I60-I62, I630-I636, I638, I639                                                                                                          |

|           |                     |                                                        |
|-----------|---------------------|--------------------------------------------------------|
| Pulmonary | Cough               | ICD10 code: R05 or use of antitussives or expectorants |
|           | Hypoxemia           | ICD10 code: R0902                                      |
|           | Shortness of breath | ICD10 code: R0600, R0602, R0609                        |

Each PASC was defined as occurrence of outcome between 30 days after infection and the end of follow up, within those without the occurrence of outcome within one year before infection.
